1 **Neofunctionalisation of basic helix loop helix proteins occurred when plants colonised the**  
2 **land**

3

4 Clémence Bonnot<sup>12</sup>, Alexander J. Hetherington<sup>1</sup>, Clément Champion<sup>1</sup>, Holger Breuning<sup>13</sup>,  
5 Steven Kelly<sup>1</sup>, Liam Dolan<sup>1#</sup>

6

7 <sup>1</sup> Department of Plant Sciences, University of Oxford, South Parks Road, Oxford, OX1 3RB,  
8 UK

9 <sup>2</sup> Present address: Labex ARBRE, UMR 1136 INRA-Université de Lorraine (IAM), INRA-Grand  
10 Est-Nancy, Champenoux, France

11 <sup>3</sup> Present address: ZMBP, Entwicklungsgenetik, 72076 Tübingen, Germany

12 **# Author for correspondence:** Tel: +44 (0) 1865 275147

13 Email: Liam.Dolan@plants.ox.ac.uk

14

15 **Abstract word count: 200**

16 **Total word count: 6277**

17 **Detail: Introduction (1045), Materials and Methods (2211), Results (1982), Discussion**  
18 **(967), Acknowledgements (72)**

19 **Figures: 8 (Coloured figures: Figures 1, 2, 3, 5, 6 and 7)**

20 **Tables: 2**

21 **Supporting information: 10 (4 Sup Data and 6 Sup Figures)**

22

23 **ABSTRACT**

24 *ROOT HAIR DEFECTIVE SIX-LIKE (RSL)* genes control the development of structures –  
25 rhizoids, root hairs, gemmae, mucilage papillae – that develop from single cells at the  
26 surface of diverse groups of land plants. RSL proteins constitute a subclass (VIIIc) of the  
27 basic helix loop helix (bHLH) class VIII transcription factor family. We set out to determine if  
28 the function of RSL genes in the control of cell differentiation in land plants was inherited  
29 from streptophyte algal ancestor. The Charophyceae are a monophyletic class of  
30 streptophyte algae with tissue-like structures and rhizoids. We identified the single class VIII  
31 bHLH gene from the charophycean alga *Chara braunii* (*CbbHLHVIII*). Phylogenetic analysis  
32 suggests that this protein is sister to the RSL (bHLH subclass VIIIc) proteins and together

33 they constitute a monophyletic group. Expression of *CbbHLHVIII* does not compensate for  
34 loss of the RSL function in either *Marchantia polymorpha* or *Arabidopsis thaliana*.  
35 Furthermore, *CbbHLHVIII* is expressed at sites of morphogenesis in *C. braunii* – the apices,  
36 nodes and gametangia – but not in rhizoids. This indicates that *C. braunii* class VIII protein is  
37 functionally different from land plant RSL proteins; they control rhizoid development in land  
38 plants but not in the charophycean algae. These data are consistent with the hypothesis  
39 that RSL proteins and their function in the differentiation of cells at the plant surface  
40 evolved in the lineage leading to land plants after the divergence of the land plants and *C.*  
41 *braunii* from their last common ancestor. This may have occurred by neofunctionalisation at  
42 or before the colonisation of the land by streptophytes.

43

44 **Key words: basic helix loop helix (bHLH), *Chara braunii*, *Coleochate nitellarum*, Land**  
45 **plants, *ROOT HAIR DEFECTIVE SIX-LIKE (RSL)*, Filamentous rooting cells, Streptophyte**  
46 **algae, Neofunctionalisation**

47

## 48 INTRODUCTION

49 The colonisation of the land by streptophytes and the subsequent radiation of  
50 morphological diversity among the land plants was a major transition in Earth history  
51 (Kenrick & Crane, 1997; Pires & Dolan, 2012). The simple body plans of extant streptophyte  
52 algae has led to the hypothesis that the body plan of the common ancestor of the land  
53 plants was simple. It is hypothesized that plants then underwent morphological  
54 diversification during and after the colonisation of the dry continental surfaces (Graham *et al.*,  
55 2000; Delaux *et al.*, 2012; Harrison, 2017). These adaptations to life on the land  
56 contributed to the establishment of the first complex terrestrial ecosystems by 407 Ma and  
57 led to the terrestrial ecosystems that exist today (Gibling & Davies, 2012; Lenton *et al.*,  
58 2012).

59 The sequencing of land plant (Rensing *et al.*, 2008; Banks *et al.*, 2011; Bowman *et al.*,  
60 2017) and streptophyte algae genomes (Hori *et al.*, 2014; Ju *et al.*, 2015; Nishiyama *et al.*,  
61 2018) has led to the hypothesis that the evolution of the morphological diversity resulted  
62 from an increase in the number of regulatory genes in gene families (Floyd & Bowman,  
63 2007; Lang *et al.*, 2010; Pires & Dolan, 2010a,b; Bowman *et al.*, 2017; Lehti-Shiu *et al.*,  
64 2017). For example, transcription factor family number is higher in land plants than in

65 streptophyte algae (Tanabe *et al.*, 2005; Navaud *et al.*, 2007; Chanderbali *et al.*, 2015;  
66 Catarino *et al.*, 2016; Nishiyama *et al.*, 2018). It is also likely that the function of regulatory  
67 genes will have changed during the course of the transition to land. Such changes could  
68 result from genes assuming new functions (neofunctionalisation) or dividing their functions  
69 among their descendants (sub-functionalisation) (Prince & Pickett, 2002; Rensing, 2014).

70         The development of a diversity of morphological structures that form from single  
71 cells in the surface cell layer of organs is regulated by RSL class 1 genes (also known as  
72 subclass VIIIc1 basic helix loop helix) in a diversity of land plants (Honkanen & Dolan, 2016).  
73 For example, RSL class 1 genes positively regulate the development of rhizoids, mucilage  
74 papillae and gemmae (asexual propagules) in the liverwort *Marchantia polymorpha* (Proust  
75 *et al.*, 2016). Orthologs positively regulate the development of rhizoids and mucilage  
76 papillae in the moss *Physcomitrella patens* (Menand *et al.*, 2007; Jang *et al.*, 2011; Proust *et al.*,  
77 *et al.*, 2016). Class 1 RSL genes positively regulate the development of root hairs in diverse  
78 groups of angiosperms including *Arabidopsis thaliana* (Masucci & Schiefelbein, 1994;  
79 Menand *et al.*, 2007) and the grasses *Oryza sativa* and *Brachypodium distachyon* (Kim &  
80 Dolan, 2016; Kim *et al.*, 2017). Expression of RSL class 1 genes from one taxa of land plant  
81 can compensate for the loss of function in another taxa (Menand *et al.*, 2007; Kim & Dolan,  
82 2016; Proust *et al.*, 2016; Kim *et al.*, 2017). For example, expression of *M. polymorpha*  
83 MpRSL1 gene using the cauliflower mosaic virus 35S promoter (35S) in the root hairless  
84 *Atrhd6 Atrsl1* mutants of *A. thaliana* restores root hair development (Proust *et al.*, 2016).  
85 This demonstrates that not only do RSL class 1 genes control the development of these  
86 structures in diverse land plants, but also that the function of the proteins has been  
87 conserved during the course of land plant evolution.

88

89         RSL class 1 genes (subclass VIIIc1) are members of class VIII basic helix loop helix  
90 (bHLH) transcription factors (Menand *et al.*, 2007; Pires & Dolan, 2010a; Proust *et al.*, 2016).  
91 Class VIII bHLH proteins includes two other subclasses, subclass VIIIa and subclass VIIIb  
92 (Heim *et al.*, 2003; Pires & Dolan, 2010a; Catarino *et al.*, 2016). The functions of subclass  
93 VIIIa proteins are unknown (Pires & Dolan, 2010a). Subclass VIIIb includes the HECATE-  
94 related transcription factors that control fruit development in *A. thaliana* (Liljegren *et al.*,  
95 2004; Gremski *et al.*, 2007; Kay *et al.*, 2013). Together the subclasses VIIIa, VIIIb and VIIIc

96 constitute a monophyletic group of proteins that is conserved among land plants. While the  
97 function of RSL class 1 genes (subclass VIIIc) have been shown to be conserved among  
98 diverse groups of land plants (Menand *et al.*, 2007; Jang *et al.*, 2011; Kim & Dolan, 2016, p.  
99 20; Proust *et al.*, 2016; Kim *et al.*, 2017), the functions of subclass VIIIb have only been  
100 defined in *A. thaliana* to date (Liljegren *et al.*, 2004; Gremski *et al.*, 2007; Kay *et al.*, 2013).

101

102         Since RSL class 1 genes control the development of rhizoids and root hairs in the  
103 mosses, liverworts and angiosperms, it is hypothesized that RSL class 1 genes control the  
104 development of the rhizoidal rooting structure in the common ancestor of the land plants  
105 (Menand *et al.*, 2007; Proust *et al.*, 2016). This was one of a suite of new functions that  
106 evolved early in land plant evolution, which was a key adaptation to life on the continental  
107 surfaces of the planet (Kenrick & Crane, 1997; Delaux *et al.*, 2012). To investigate the origin  
108 of this regulatory mechanism we searched the genome (Nishiyama *et al.*, 2018) and  
109 transcriptomes of the streptophyte alga *Chara braunii* for genes encoding class VIII bHLH  
110 proteins. *C. braunii* is a member of the Charophyceae, the only class of streptophyte algae in  
111 which tissue-like structures and rhizoids develop (Smith & Allen, 1955; Pickett-Heaps, 1975;  
112 Graham & Wilcox, 2000; Nishiyama *et al.*, 2018). We identified a single class VIII gene  
113 (*CbbHLHVIII*) that is sister to the land plant RSL (subclass VIIIc) transcription factors. The  
114 expression of *CbbHLHVIII* in *M. polymorpha* or *A. thaliana* mutants does not compensate for  
115 the loss of endogenous RSL function, indicating that *C. braunii* class VIII protein is  
116 functionally different from the land plant RSL proteins. Furthermore, *CbbHLHVIII* is  
117 expressed in regions of organogenesis - apices and young nodes of the thallus, and  
118 gametangia - but not in rhizoids or in rhizoids morphogenesis zones. This is consistent with  
119 the hypothesis that *CbbHLHVIII* regulates development at *C. braunii* morphogenetic centres,  
120 but does not control rhizoid differentiation. We conclude that class VIII proteins evolved the  
121 ability to control the differentiation of cells such as rhizoids in the land plant lineage after  
122 the divergence of *C. braunii* and land plants from their last common ancestor. This is  
123 consistent with a model in which neofunctionalisation of class VIII proteins occurred during  
124 the increase in morphological diversity that occurred during the transition to land.

125

## 126 **MATERIALS AND METHODS**

### 127 **Sequence identification**

128 To identify class VIII sequences in *Chara braunii* and *Coleochaete nitellarum*, we used the  
129 land plants bHLH class VIII protein sequences of *Arabidopsis thaliana*, *Selaginella*  
130 *moelendorffii*, *Physcomitrella patens* and *Marchantia polymorpha* published previously  
131 (Catarino *et al.*, 2016) as queries in TblastN searches (Altschul *et al.*, 1990) of *Coleochaete*  
132 *nitellarum* transcriptome (Bonnot *et al.*, 2017) and *C. braunii* genome (Nishiyama *et al.*,  
133 2018) and transcriptome (see “Construction of the *C. braunii* transcriptome”  
134 hereafter). No E-value thresholds were used. All hits were manually investigated. Transcripts  
135 and genomic sequences were aligned. Amino acid sequences were predicted from  
136 transcripts using ExpASy translate (ExpASy, University of Geneva, Geneva, Switzerland) and  
137 analysed with SMART (<http://smart.embl-heidelberg.de>) and Pfam  
138 (<http://pfam.sanger.ac.uk/search>) to determine if a bHLH domain was coded in each  
139 transcript. Reciprocal TblastN searches (Altschul *et al.*, 1990) were conducted on NCBI  
140 (<http://blast.ncbi.nlm.nih.gov/Blast.cgi>) to verify if the hits containing a bHLH domain  
141 belonged to the bHLH class VIII family.

142 Unique bHLH class VIII gene candidates (later named *CnbHLHVIII* and *CbbHLHVIII*)  
143 were found in the *C. nitellarum* transcriptome (transcript\_12969), and in the *C. braunii*  
144 transcriptome (Cb\_Transcript\_119934) and genome (CHBRA233g00280) respectively. We  
145 verified the sequence of *CnbHLHVIII* and *CbbHLHVIII* transcripts by PCR (primers listed in  
146 Table 1) using cDNA from whole plant total RNA and Sanger sequencing (Source Bioscience,  
147 Nottingham, UK). The transcript encoding *CnbHLHVIII* was 2769 nucleotides long and  
148 contained a 1725 nucleotide CDS coding for a 574 amino acid protein (Supplementary Data  
149 1). The transcript encoding *CbbHLHVIII* was 6103 nucleotides long and contained a 3468  
150 nucleotides CDS coding for a 1155 amino acids protein (Supplementary Data 1). The CDS  
151 and protein sequences of *CnbHLHVIII* and *CbbHLHVIII* were uploaded on Genbank under the  
152 accession numbers MK292332 and MK292331 respectively.

153

#### 154 **Phylogeny and protein domain analysis**

155 We used the iterative refinement method L-INS-i (Katoh *et al.*, 2005) on MAFFT--add (Katoh  
156 & Frith, 2012; Katoh & Standley, 2013) to add the full length protein sequences of  
157 *CnbHLHVIII* and *CbbHLHVIII* to the previously published alignment of full length bHLH  
158 proteins from the land plants *A. thaliana*, *Oryza sativa*, *S. moelendorffii*, *P. patens* and *M.*  
159 *polymorpha*, the streptophyte alga *Klebsormidium flaccidum*, the chlorophyte algae *Volvox*

160 *carteri*, *Chlamydomonas reinhardtii*, *Chlorella variabilis* and *Ostreococcus tauri* and, the  
161 rodophyte alga *Cyanidioschyzon merolae* (Supplementary Data 2) (Catarino *et al.*, 2016). The  
162 alignment was trimmed manually with BioEdit v.7.1 (Hall, 1999) to remove the non-  
163 conserved regions (Supplementary Data 3). Maximum-likelihood analysis was carried-out  
164 with PhyML 3.0 (Guindon *et al.*, 2010), with the Jones Taylor and Thornton (JTT) amino acid  
165 substitution model (Jones *et al.*, 1992), on the complete set of aligned and trimmed proteins  
166 (Archaeplastida bHLH phylogeny; Figure 1.A and Supplementary Figure S1) and on a reduced  
167 set (Supplementary Data 4) containing only the members of the bHLH class VIII family,  
168 CnbHLHVIII and CbbHLHVIII (bHLH class VIII phylogeny; Figure 1.B and Supplementary Figure  
169 S2). The statistical branch support values were calculated with an approximate likelihood  
170 ratio test (aLRT) (Guindon *et al.*, 2010). Trees were visualised using FigTree  
171 (<http://tree.bio.ed.ac.uk/software/figtree/>). The presence of the bHLH class VIII conserved  
172 motifs was assessed using the amino acid alignment (Supplementary Figure S3) and MEME  
173 (Multiple Em for Motif Elicitation) (Bailey & Elkan, 1994) with a constraint of 1 to 4  
174 conserved motifs on members of each subclasses (VIIIa, HECATE, RSL class 1, RSL class 2 and  
175 RSL class 3) associated with CnbHLHVIII and CbbHLHVIII. The LOGO representation of the  
176 amino-acid sequence of each bHLH class VIII conserved motif was produced using WebLogo  
177 (<https://weblogo.berkeley.edu>).

178

### 179 **Plant growth conditions**

180 *C. nitellarum* (strain provided by the Skidmore Algal collection of Professor David Domozych)  
181 were grown in cell culture flasks (cell star, 250 mL, filter cap; Greiner Bio-One,  
182 Kremsmunster, Austria) in 75 mL of liquid  $\text{NaNO}_3^-$ -Bold Basal Medium (Nichols, 1973)  
183 supplemented with  $1\text{g.L}^{-1}$  of  $\text{NaNO}_3^-$ , renewed every six weeks, under a cycle of 8h:16h  
184 dark:light ( $38\ \mu\text{mol.m}^{-2}.\text{s}^{-1}$ ) at  $23^\circ\text{C}$  at 45 rpm.

185 *C. braunii* (strain S276) (Nishiyama *et al.*, 2018) was grown under axenic conditions  
186 on a metallic net immersed in modified Forsberg liquid medium ( $0.56\ \text{mg.L}^{-1}\ \text{Na}_2\text{HPO}_4$ ,  $0.112\ \text{g.L}^{-1}\ \text{Ca}(\text{NO}_3)_2.3\text{H}_2\text{O}$ ,  $0.1\ \text{g.L}^{-1}\ \text{MgSO}_4.7\text{H}_2\text{O}$ ,  $0.0174\ \text{g.L}^{-1}\ \text{Na}_2\text{SiO}_3.5\text{H}_2\text{O}$ ,  $0.03\ \text{g.L}^{-1}\ \text{KCl}$ ,  $0.02\ \text{g.L}^{-1}\ \text{Na}_2\text{CO}_3$ ,  $2\ \mu\text{g.L}^{-1}\ \text{MnCl}_2$ ,  $2\ \mu\text{g.L}^{-1}\ \text{CoCl}_2$ ,  $4\ \mu\text{g.L}^{-1}\ \text{CuCl}_2$ ,  $0,4\ \text{mg.L}^{-1}\ \text{FeCl}_2$ ,  $0,1\ \text{mg.L}^{-1}\ \text{ZnCl}_2$ ,  $0,1\ \text{mg.L}^{-1}\ \text{NaMoO}_4$ ,  $0.4\ \text{mg.L}^{-1}\ \text{H}_3\text{BO}_3$ ,  $0.5\ \text{g.L}^{-1}\ \text{TRIS}$ ,  $0,02\ \text{mg.L}^{-1}$  Nitrilo triacetic acid (NTA))  
189  $(\text{Forsberg}, 1965)$  pH 7.8 supplemented with Kao and Michayluk vitamin solution (100X)  
190

191 (#K3129; Sigma, St-Louis, MO, USA) at 23°C under a light cycle of 8 h : 16 h, dark : light  
192 ( $38 \mu\text{mol.m}^{-2}.\text{s}^{-1}$ ).

193 *M. polymorpha* wild type accessions Takaragaike-1 (Tak-1) male and Takaragaike-2  
194 (Tak-2) female (Ishizaki *et al.*, 2008) and the loss of function *Mprsl1-1* mutant (Proust *et al.*,  
195 2016) were used in this study. Meristem-containing thallus fragments of axenic *Mprsl1-1*  
196 and wild type and, surface sterile spores produced from the cross of Tak-1 and Tak-2 were  
197 transformed with binary vectors (see vectors construction hereafter) using agrobacterium  
198 (strain GV3101) following published co-cultivation protocols (Ishizaki *et al.*, 2008; Kubota *et al.*,  
199 2013). After transformation, regenerated thalli or sporelings were selected on ½  
200 Johnson's medium 1% agar supplemented with  $100 \mu\text{g.mL}^{-1}$  of cefotaxime and  $10 \mu\text{g.mL}^{-1}$  of  
201 hygromycin or  $10 \mu\text{M}$  of chlorsulfuron depending on the vector (see vector construction  
202 hereafter). For phenotypic and expression analyses, Tak-1, Tak-2 and *Mprsl1-1* thalli, Tak-1  
203 and Tak-2 sporelings, transformed sporelings or thalli were grown in axenic conditions on ½  
204 Johnson's medium 0.7% agar at 23°C under continuous illumination ( $38 \mu\text{mol.m}^{-2}.\text{s}^{-1}$ ).

205 Wild type *A. thaliana* Columbia (Col-0) and the loss of function *Atrhd6-3 Atrsl1-1*  
206 double mutant (Menand *et al.*, 2007) were used in this study. Plants were transformed by  
207 floral deep (Zhang *et al.*, 2006) with binary vectors (see vectors construction hereafter)  
208 using agrobacterium (strain GV3101) cultures. Before, in vitro culture seeds were surface  
209 sterilized ten minutes with a solution of 70% Ethanol and 0.1% Triton X-100 and ten minutes  
210 with a solution of 99% ethanol. After transformation seeds were selected on MS medium  
211 1% agar supplemented with  $50 \mu\text{g.mL}^{-1}$  of hygromycin. For phenotypic and expression  
212 analyses, seeds of wild type, mutants and of three T2 transformant lines for each construct  
213 were grown as previously described (Breuninger *et al.*, 2016).

214

### 215 **Phenotypic analysis and image acquisition**

216 Transmitted light microscopy images of *C. braunii*, *M. polymorpha* and *A. thaliana* were  
217 captured using a camera (Leica DFC310 FX; Leica, Wetzlar, Germany) mounted on a  
218 dissecting microscope (Leica M165 FC; Leica, Wetzlar, Germany). For *A. thaliana*, 15 plants  
219 per line were phenotyped 10 days after germination. For each line of *M. polymorpha* over-  
220 expressing 35S:*AtRHD6*, *MpRSL1* and *CbbHLHVIII* in the wild type background, 5 plants were

221 phenotyped four weeks after spore transformation. 20 plants were phenotyped for each  
222 line generated by transforming the vector into the *M. polymorpha* *Mprs1* knockout mutant  
223 background, seven and ten weeks after thallus regeneration.

224 *C. braunii* rhizoid nodal growth pattern was analysed on 107 nodes (32 N<sub>1</sub>, 26 N<sub>2</sub>, 22  
225 N<sub>3</sub>, 15 N<sub>4</sub> and 12 N<sub>older</sub>) from 13 plants. The stage (N<sub>1</sub>, N<sub>2</sub>, N<sub>3</sub>, N<sub>4</sub> or N<sub>older</sub>) and the presence  
226 or absence of initiating, unicellular elongating, multicellular and branched rhizoids were  
227 noted for each node. The percentage of node of each stage (N<sub>1</sub>, N<sub>2</sub>, N<sub>3</sub>, N<sub>4</sub> and N<sub>older</sub>)  
228 displaying initiating, unicellular elongating, multicellular and branched rhizoids were  
229 calculated. Most nodes displayed rhizoids at different stages and were therefore used in the  
230 calculation of the percentage of node for each of the rhizoid categories they displayed.

231

### 232 **RNA extraction, cDNA synthesis**

233 Total RNA was extracted with a mir<sup>TM</sup>Vana Kit (#AM1560; Thermo Fisher scientific,  
234 Waltham, MA, USA) from frozen *C. braunii* whole plants for cDNA synthesis and cloning.  
235 Total RNA for transcriptomes was isolated using the same protocol from frozen rhizoids,  
236 green thalli with attached gametangia and whole plants. mRNA was extracted with a  
237 Dynabeads<sup>®</sup>mRNA DIRECT<sup>TM</sup> Kit (#61011; Thermo Fisher scientific, Waltham, MA, USA) from  
238 ground frozen tissues collected as follows. Two weeks after propagation, rhizoids grown  
239 below a metallic net were cut and flash frozen in liquid nitrogen for total RNA and mRNA  
240 extraction. *C. braunii* thallus cleaned from any remaining rhizoids with gametangia (for total  
241 RNA extraction) or without (for mRNA extraction) and, thallus parts (apices, nodes,  
242 branches, gametangia and zygotes were collected by hand under a dissecting microscope  
243 (Leica M165 FC; Leica, Wetzlar, Germany) and flash frozen in liquid nitrogen. Total RNA and  
244 mRNA were DNase treated using the Turbo DNase<sup>TM</sup> Kit (#AM2238; Thermo Fisher  
245 scientific, Waltham, MA, USA) according manufacturer's instructions. cDNAs were  
246 synthesized from 5 µg of total RNA or 20 ng of mRNA in 20 uL reaction volume using the  
247 SuperScript III First-strand synthesis System (#18080051; Thermo Fisher scientific, Waltham,  
248 MA, USA) with the oligo (dT<sub>20</sub>) provided.

249 Total RNA was extracted with Direct-Zol RNA Miniprep Kits (#R2060; Zymo research,  
250 Irvine, CA, USA) from ground frozen whole plant for *C. nitellarum* and *M. polymorpha* and,  
251 from roots for *A. thaliana*. *C. nitellarum*, *M. polymorpha* and *A. thaliana* samples of total



252 RNA were DNase treated using the Turbo DNase-free™ Kit (#AM1907; Thermo Fisher  
253 scientific, Waltham, MA, USA). cDNAs were synthesised from 1 µg of total RNA in a 20 µL  
254 reaction volume using 200 U of Protoscript II reverse transcriptase (#M0368S; NEB, Ipswich,  
255 MA, USA), oligo (dT<sub>17</sub>) at 2 µM and the NEB Murine RNase inhibitor (#M0314; NEB, Ipswich,  
256 MA, USA).

257

### 258 **Construction of the *C. braunii* transcriptome**

259 The whole plant *C. braunii* transcriptome was produced by the sequencing of ten strand-  
260 specific cDNA libraries (two whole plants libraries, two green thallus libraries and four  
261 rhizoid libraries) with an insert size of 500 bp, using a paired-end read length of 2 X 100 bp  
262 on Illumina Hiseq2000. GATC Biotech Ltd (Eurofingonomics, Konstanz, Germany) performed  
263 the preparation of the libraries from 2 µg of total RNA and sequencing.

264 Raw reads were quality trimmed with Trimmomatic-0.32 (Bolger *et al.*, 2014), to  
265 remove Illumina adaptors and low quality tails. Ribosomal RNA was filtered out with  
266 Sortmerna-1.9 (Kopylova *et al.*, 2012). Reads were further error corrected using Allpaths-LG-  
267 4832 (Butler *et al.*, 2008) (with setting PAIRED\_SEP=-20 and ploidy = 1). Trimmed and  
268 corrected reads were normalised using Khmer-0.7.1 with a khmer size of 31. Before  
269 assembly, paired end reads were stitched together using Allpaths-LG-4832 (Butler *et al.*,  
270 2008). A de novo transcriptome assembly was made with the cleaned, stitched reads using  
271 SGA (Simpson & Durbin, 2012), SSPACE-v3 (Boetzer *et al.*, 2011), and CAP3 (Huang &  
272 Madan, 1999). Finally assembled scaffolds were corrected using Pilon-1.6 (Walker *et al.*,  
273 2014). The transcriptome assembly of *C. braunii* consisted of 117,611 transcripts with a  
274 mean sequence length of 749 bp. 21,917 of the transcripts were over 1kb in length. This  
275 Transcriptome Shotgun Assembly project has been deposited at DDBJ/EMBL/GenBank  
276 under the accession GGXX00000000. The version described in this paper is the first version,  
277 GGXX01000000.

278 The expression level of each transcript was next quantified. Raw reads were quality  
279 trimmed with Trimmomatic-0.32 (Bolger *et al.*, 2014), Sortmerna-1.9 (Kopylova *et al.*, 2012)  
280 and BAYESHAMMER (SPADES-3.5.0) (Nikolenko *et al.*, 2013). Corrected reads were mapped  
281 to the transcriptome using Salmon 0.9.1 (Patro *et al.*, 2017).

282

### 283 **Cloning and vector construction**

284 The CDSs encoding CbbHLHVIII, CnbHLHVIII, MpRSL1 and AtRHD6 were amplified  
285 respectively from *C. braunii*, *C. nitellarum*, *M. polymorpha* and *A. thaliana* cDNA made from  
286 total RNA, using the high-fidelity polymerase Phusion (#F530L; Thermo Fisher Scientific,  
287 Waltham, MA, USA) with the primers listed in Table 1. For *C. braunii* and *C. nitellarum* we  
288 used a slow elongation rate of 70s.Kb<sup>-1</sup>. The CDSs of CbbHLHVIII, MpRSL1 and AtRHD6 were  
289 then cloned into pCR8-GW-TOPO vectors (#K2500-20; Thermo Fisher Scientific) to establish  
290 Gateway™ (GW) entry vectors. For *A. thaliana* transformations, the pCR8 entry vectors  
291 containing the CDSs encoding CbbHLHVIII and AtRHD6 were recombined with the  
292 destination vector pCambia p35S:GW:T (Breuninger *et al.*, 2016) by LR reactions (#12538-  
293 200; Thermo Fisher Scientific). For *M. polymorpha* transformations, the entry vectors  
294 containing the CDSs encoding CbbHLHVIII and MpRSL1 were recombined by LR reactions  
295 (#12538-200; Thermo Fisher scientific, Waltham, MA, USA) with the destination vectors  
296 pCambia p35S:GW:T (carrying the resistance to hygromycin) (Breuninger *et al.*, 2016) and  
297 pCambia pMpEF1α:GW:T carrying a mutated version of the MpALS<sub>m</sub> gene driven by the  
298 p35S promoter and conferring plant resistance to chlorsulfuron. This vector was generated  
299 by splicing PCR products of the MpALS<sub>m</sub> gene with the 35S promoter together with the  
300 MpEF1α promoter into a XhoI/PstI-digested pCAMBIA backbone using the Clontech In-  
301 Fusion kit (Clontech Cat. #: 638909) and the primers indicated in Table 1. Subsequently, this  
302 vector was converted into a Gateway™ destination vector using the inserted SmaI site next  
303 to the MpEF1α promoter using the Gateway™ Vector Conversion System (Thermo Fisher  
304 Cat. #: 11828029).

305

### 306 **Expression analysis**

307 Quantitative PCR analyses were done on a 7300 Applied Biosystems thermocycler (Thermo  
308 Fisher scientific, Waltham, MA, USA) using the SensiFAST™ Sybr® Hi-ROX Kit (#BIO-92020;  
309 Biorline, London, UK). Amplification was performed in a reaction volume of 10 μL containing  
310 500 nM of each of the forward and reverse primers and 4 μL of a two-fold dilution of *C.*  
311 *braunii* cDNA synthesized from mRNA or of ten-fold dilutions of *M. polymorpha* and *A.*

312 *thaliana* cDNA synthesized from total RNA. Data analysis were carried out as previously  
313 described (Saint-Marcoux *et al.*, 2015) using the reference genes *AtUBQ10* and *AtPDF2*  
314 (Czechowski *et al.*, 2005), *MpACT* and *MpCUL* (Saint-Marcoux *et al.*, 2015) and, *CbELF5a*  
315 (*CHBRA130g00470*). All primer used are listed in Table 1.

316

## 317 **RESULTS**

### 318 **There is a single class VIII basic helix loop helix transcription factor in the *Chara braunii*** 319 **genome**

320 To determine if genes encoding class VIII bHLH transcription factors control rhizoid  
321 development in charophyceae algae, we searched a *C. braunii* transcriptome for similar  
322 sequences. We isolated RNA from whole *C. braunii* plants, green parts and from rhizoids.  
323 We sequenced the RNA and assembled a transcriptome with an N50 value of 1229 bp and a  
324 mean length of 749 bp (Table 2). Using the TBLASTN algorithm and the class VIII protein  
325 sequences of *A. thaliana*, *Selaginella moelendorffi*, *Physcomitrella patens* and *M.*  
326 *polymorpha* (Catarino *et al.*, 2016) as queries, we identified a single nucleotide sequence  
327 encoding a predicted protein of 1155 amino acids similar to the land plant class VIII proteins  
328 (*Cb\_Transcript\_119934*) (Supplementary Data 1). We further searched the *C. braunii*  
329 genome and transcriptome assemblies (Nishiyama *et al.*, 2018), using the same queries and  
330 the complete sequence of the putative *C. braunii* class VIII bHLH protein as a query but did  
331 not identify further new class VIII sequences. We also identified a putative class VIII bHLH  
332 protein from a *Coleochaete nitellarum* transcriptome (Bonnot *et al.*, 2017) (Supplementary  
333 Data 1). No putative class VIII bHLH sequence was found in *Klebsormidium flaccidum* (Hori *et*  
334 *al.*, 2014; Catarino *et al.*, 2016).

335 To test if the putative *C. braunii* and *C. nitellarum* class VIII bHLH proteins belong to  
336 the class VIII bHLH family, we aligned the sequences around their bHLH domain with bHLH  
337 sequences from 11 Archaeplastida taxa and generated a phylogenetic tree using the  
338 maximum likelihood statistics (Figure 1 and Supplementary Figure S1 and S2) (Catarino *et*  
339 *al.*, 2016). The topology of the tree indicated that the *C. braunii* putative class VIII bHLH  
340 protein was sister to the RSL (subclass VIIIc) proteins while *C. nitellarum* putative class VIII  
341 bHLH protein was sister to the RSL class 1 (subclass VIIIc 1) and class 2 (subclass VIIIc 2).  
342 Since the *C. braunii* and *C. nitellarum* proteins constituted a monophyletic group with the  
343 other class VIII bHLH proteins, we conclude that the *C. braunii* and *C. nitellarum* proteins are

344 class VIII members, and designated them respectively CbbHLHVIII and CnbHLHVIII. These  
345 data indicate that a single gene encoding a class VIII bHLH protein existed in the last  
346 common ancestor of *C. braunii*, *C. nitellarum* and the land plants. They also demonstrate  
347 that a single copy class VIII bHLH gene is present in both *C. braunii* that develops rhizoids  
348 and in *C. nitellarum* that does not develop rhizoids.

349

### 350 **CbbHLHVIII and CnbHLHVIII lack the conserved motifs present in the land plant class VIII** 351 **proteins**

352 Land plant class VIII bHLH proteins are characterised by distinct, conserved motifs near and  
353 in the bHLH domain (Figure 2). They possess a very conserved bHLH domain (Figure 2.A and  
354 Supplementary Figure S3) containing an atypical basic domain characterised by the  
355 presence of a conserved Alanine (A<sup>210</sup> in AtRHD6) at position 9 of the bHLH domain (Figure  
356 2.A and Supplementary Figure S3) that is not found in the other bHLH classes  
357 (Supplementary Figure S4 and Data S2) (Heim *et al.*, 2003; Liljegren *et al.*, 2004; Gremski *et*  
358 *al.*, 2007). There is an atypical basic domain, typical of class VIII bHLH proteins, in both  
359 CbbHLHVIII and CnbHLHVIII (Figure 2.C and Supplementary Figure S3 and S4).

360 There are conserved characteristic amino acid motifs in RSL (subclass VIIIc) and  
361 HECATE (subclass VIIIb) proteins (Pires & Dolan, 2010a). A conserved motif is located just  
362 after the bHLH domain in members of the RSL subfamily (VIIIc) (Figure 2.C and  
363 Supplementary Figure S3). The precise sequence of this motif is characteristic of each of the  
364 three monophyletic RSL subclasses. KVLATDEFWPAQGGKAPDISQVKDALDAI is found in  
365 members of the RSL subclass 1 (VIIIc1), APIAYNGMDIG in members of the RSL subclass 2  
366 (VIIIc2) and NKDSASEVKCEKWKEFIDAQT in members of the RSL subclass 3 (VIIIc3) (Figure  
367 2.B). Similarly, a conserved sequence (DPIAVSRPKRRNVRI) is located just before the N-  
368 terminal of the bHLH domain in members of the HECATE (VIIIb) subclass (Figure 2.B and C).  
369 None of the conserved amino-acid motifs of the RSL and HECATE proteins are present in the  
370 CbbHLHVIII or CnbHLHVIII protein sequences (Figure 2.C and Supplementary Figure S3). This  
371 suggests that these land plant specific motifs evolved after the divergence of *C. braunii* and  
372 *C. nitellarum* from the last common ancestors with the land plants.

373

### 374 **CbbHLHVIII protein cannot replace the RSL proteins that positively regulate root hair** 375 **development in *Arabidopsis thaliana***

376 To assess if *CbbHLHVIII* controls the development of filamentous rooting cells (rhizoids and  
377 root hairs) in land plants, we tested if *CbbHLHVIII* could substitute for the loss of RSL  
378 function in *A. thaliana* mutants. *Atrhd6 Atrsl1* double mutants are devoid of RSL class 1  
379 function and do not develop root hairs (Figure 3) (Menand *et al.*, 2007). To test the ability of  
380 *CbbHLHVIII* to restore root hair development, *Atrhd6 Atrsl1* double mutants were  
381 transformed with a gene construct driving the expression of *CbbHLHVIII* under the control of  
382 the cauliflower mosaic virus 35S constitutive promoter (*p35S:CbbHLHVIII:T*). We identified  
383 three lines that expressed *CbbHLHVIII* at high levels (Figure 3.A and B). None of these *Atrhd6*  
384 *Atrsl1 p35S:CbbHLHVIII:T* plants developed root hairs (Figure 3.C). As a control, *Atrhd6*  
385 *Atrsl1* double mutants were transformed with either a *p35S:AtRHD6:T* or a *p35S:MpRSL1:T*  
386 gene constructs which overexpressed the *A. thaliana* and *M. polymorpha* RSL subclass 1  
387 genes respectively (Figure 3.A and B). Both the *Atrhd6 Atrsl1 p35S:AtRHD6:T* and the *Atrhd6*  
388 *Atrsl1 p35S:MpRSL1:T* plants developed root hairs (Figure 3.C). These data indicate that  
389 expression of a class VIII protein from *C. braunii* cannot compensate for loss of *AtRHD6* and  
390 *AtRSL1* function. This suggests *CbbHLHVIII* does not function in rhizoid development and  
391 indicates that *CbbHLHVIII* is functionally different from the RSL subclass 1 proteins *AtRHD6*  
392 and *AtRSL1*.

393

#### 394 ***CbbHLHVIII* protein cannot replace the RSL protein that positively regulates rhizoid** 395 **development in *Marchantia polymorpha***

396 To independently determine if the function of *CbbHLHVIII* could substitute for RSL function  
397 in land plants, we tested the ability of *CbbHLHVIII* to restore rhizoid development in the  
398 rhizoidless *Mprsl1* loss of function mutant of *M. polymorpha* (Figure 4 and 5). We  
399 transformed the *Mprsl1* mutant with a gene construct in which the *CbbHLHVIII* gene was  
400 under the control of the constitutive promoter of *M. polymorpha* *EF1 $\alpha$*  (*pMpEF1 $\alpha$ :CbbHLHVIII:T*) (Althoff *et al.*, 2014). Five *Mprsl1 pMpEF1 $\alpha$ :CbbHLHVIII:T* lines with high  
401 steady state levels of the *C. braunii* transgene were identified (Figure 4). None of these  
402 *Mprsl1 pMpEF1 $\alpha$ :CbbHLHVIII:T* plants developed rhizoids (Figure 5). As a control, we  
403 transformed the *Mprsl1* loss of function mutant with a *pMpEF1 $\alpha$ :MpRSL1:T* gene construct.  
404 *Mprsl1* plants transformed with *pMpEF1 $\alpha$ :MpRSL1:T* developed rhizoids indicating that  
405 overexpression of the *MpRSL1* class VIII protein driven by the promoter of *M. polymorpha*  
406 *EF1 $\alpha$*  compensate for the loss of *MpRSL1* function (Figure 5). The lack of rhizoid  
407

408 development on *Mprsl1* pMpEF1 $\alpha$ :CbbHLHVIII:T plants demonstrates that class VIII bHLH  
409 protein from *Chara braunii* (CbbHLHVIII) cannot substitute for MpRSL1 function during  
410 rhizoid development in *Mprsl1* mutants. These data suggest that CbbHLHVIII and MpRSL1  
411 are functionally different.

412

#### 413 **Expression of CbbHLHVIII in wild type *Marchantia polymorpha* does not induce** 414 **supernumerary rhizoid development**

415 To verify that CbbHLHVIII could not promote rhizoid development in *M. polymorpha* using a  
416 different experimental approach, we ectopically overexpressed CbbHLHVIII in wild type and  
417 compared the phenotypes to the phenotypes of plants that ectopically overexpress the  
418 endogenous MpRSL1 gene (Figure 6). Ectopic overexpression of MpRSL1 using the 35S  
419 promoter (p35S:MpRSL1:T) induced the development of supernumerary rhizoids in wild  
420 type. However, expression of CbbHLHVIII from the 35S promoter (p35S:CbbHLHVIII:T) in wild  
421 type *M. polymorpha* did not induce supernumerary rhizoid development. This verifies that  
422 CbbHLHVIII cannot function during rhizoid development in *M. polymorpha*. This is consistent  
423 with the hypothesis that CbbHLHVIII does not control rhizoid development and that  
424 CbbHLHVIII and MpRSL1 proteins are functionally different.

425

#### 426 **CbbHLHVIII protein cannot replace the RSL protein that positively regulates gemma** 427 **development in *Marchantia polymorpha***

428 To independently verify that CbbHLHVIII cannot substitute for MpRSL1 in *M. polymorpha*,  
429 we tested the ability of CbbHLHVIII to restore gemma development in *Mprsl1* mutants  
430 (Figure 5). *Mprsl1* mutants rarely develop gemmae; the gemma cups of *Mprsl1* mutants are  
431 empty while gemmae can fill gemma cups of wild type plants. None of the *Mprsl1* plants  
432 transformed with the pMpEF1 $\alpha$ :CbbHLHVIII:T gene construct developed gemmae and  
433 gemma cups were empty. The control *Mprsl1* plants transformed with the  
434 pMpEF1 $\alpha$ :MpRSL1:T gene construct developed gemmae and gemma cups were full.  
435 Together these data indicate that overexpression of the CbbHLHVIII protein cannot  
436 compensate for loss of MpRSL1 function during gemma development in *Mprsl1* mutants.  
437 This is consistent with the hypothesis that the function of CbbHLHVIII is different from  
438 MpRSL1.

439

#### 440 ***Chara braunii* develop rhizoids from multicellular nodes**

441 The green thallus of *C. braunii* comprises several axes, each consisting of alternating nodes  
442 and internodes (Figure 7.A) (Smith & Allen, 1955; Pickett-Heaps, 1975; Graham & Wilcox,  
443 2000; Nishiyama *et al.*, 2018). The internodes are composed of a single elongated cell, while  
444 the nodes are multi-cellular and are the sites from which branches (determinate structures)  
445 and new axes (indeterminate structures) initiate. To define where *C. braunii* rhizoids  
446 develop, we grew individual *C. braunii* algae in axenic liquid culture and found that rhizoids  
447 developed from the nodal complexes (Figure 7). No rhizoids were present on nodes 1 and 2  
448 where node 1 is the node nearest the apex (Figure 7.B). After initiation from a nodal cell, the  
449 rhizoid elongates by tip growth (Supplementary Figure S5) and cell division. Growing  
450 rhizoids can branch (Supplementary Figure S5). Rhizoids of all developmental stages –  
451 initiating rhizoids, elongating rhizoids, multicellular rhizoids and branched rhizoids – are  
452 present on node 3 and older nodes (Figure 7.B). These observations indicate that, in our  
453 growth condition, rhizoids develop from the nodal complexes of the thallus. Nodal initiation  
454 of rhizoids begins from the nodes in 3<sup>rd</sup> position from the apical meristem and initiation  
455 continues in older nodes (Figure 7.B and C).

456

#### 457 ***CbbHLHVIII* is expressed at the apex and gametangia of *Chara braunii***

458 The demonstration that expression of *CbbHLHVIII* does not restore rhizoid development in  
459 *Atrhd6 Atrs11* double mutants or *Atrhd6 Atrs1* double mutants suggests that this protein is  
460 not involved in rhizoid development in *C. braunii*. In land plants, RSL Class 1 encoding genes  
461 (subclass VIIIc) are expressed in filamentous rooting cells – rhizoid cells and root hair cells –  
462 and the cells from which rhizoid cells and root hair cells develop (Menand *et al.*, 2007; Jang  
463 *et al.*, 2011; Kim & Dolan, 2016; Proust *et al.*, 2016; Kim *et al.*, 2017). To determine where  
464 *CbbHLHVIII* is expressed during *C. braunii* development, we measured the steady state levels  
465 of *CbbHLHVIII* mRNA using quantitative RT-PCR (Figure 8). In the first experiment, RNA was  
466 isolated from thallus, rhizoids, gametangiophores (antheridia and archegonia) and zygotes  
467 (Figure 7 and Supplementary Figure S6). The highest steady state levels of *CbbHLHVIII* mRNA  
468 were detected in the thallus and gametangiophores (Figure 8.A). Low steady state levels of  
469 *CbbHLHVIII* mRNA were detected in rhizoids and zygotes. These results were consistent with  
470 the levels of expression of *CbbHLHVIII* (*Cb\_Transcript\_119934*) detected in the thallus and  
471 rhizoid transcriptomes (Supplementary Table 1). To identify where in the thallus *CbbHLHVIII*

472 mRNA accumulated, we isolated RNA from different thallus structures (Figure 8.B). Steady  
473 state levels of *CbbHLHVIII* mRNA were highest at the apex (apical meristem and node 1) and  
474 levels were progressively lower in nodes 2 and nodes 3. Relatively high steady state levels of  
475 *CbbHLHVIII* mRNA were observed in gametangia-bearing branches, while *CbbHLHVIII* mRNA  
476 levels were lower in branches without gametangia. This suggests that *CbbHLHVIII* mRNA  
477 accumulates in apices and gametangia. These data are consistent with *CbbHLHVIII* being  
478 expressed in the morphogenetic centres of *C. braunii*, the apex, node 1 and gametangia. The  
479 low steady state levels of *CbbHLHVIII* mRNA in rhizoids and in nodes bearing initiating  
480 rhizoids (node 3 and older) suggest that *CbbHLHVIII* expression is not involved in rhizoid  
481 development. Taken together these data indicate that *CbbHLHVIII* is expressed in the *C.*  
482 *braunii* morphogenetic centres but suggest that this transcription factor not involved in  
483 rhizoid development.

484

## 485 **DISCUSSION**

486 Charophycean algae develop complex bodies from morphogenetic centres located at the  
487 apices of their axes, like land plants (Smith & Allen, 1955; Pickett-Heaps, 1975; Graham &  
488 Wilcox, 2000). These axes develop a diversity of cell types including tip-growing cells called  
489 rhizoids that are involved in nutrient uptake (Box, 1986, 1987; Andrews, 1987; Vermeer *et*  
490 *al.*, 2003; Wuestenberg *et al.*, 2011) and anchorage (Graham & Wilcox, 2000). Tip-growing  
491 cells involved in nutrient uptake and anchorage also evolved among the land plants (Jones &  
492 Dolan, 2012; Bonnot *et al.*, 2017): the tip-growing rhizoids of bryophytes and root hairs of  
493 euphyllophytes. No other streptophyte algae form morphogenetic centres or develop the  
494 same level of cellular complexity that is characteristic of the charophycean algae (Pickett-  
495 Heaps, 1975; Graham & Wilcox, 2000). The distribution of morphological traits on the most  
496 recent streptophyte phylogenies suggests that increased body plan complexity evolved  
497 independently in the charophycean lineage and in the lineage leading to the land plants  
498 (embryophytes) (Wodniok *et al.*, 2011; Wickett *et al.*, 2014; Nishiyama *et al.*, 2018). If  
499 rhizoid evolved independently in the land plants and charophycean lineages, we might  
500 predict that different mechanisms regulating rhizoid differentiation evolved in the two  
501 lineages.

502 Two broad conclusions can be made from our results. First, we conclude that  
503 different mechanisms control the initiation of rhizoid development in Charophycean algae



504 and land plants. Second, we conclude that the acquisition of the rhizoid development  
505 function by class VIII bHLH evolved in the land plant lineage after the divergence of extant  
506 streptophyte algae and the land plants from their last common ancestor.

507 Class VIII bHLH proteins are required for the formation of tip-growing rooting cells in  
508 in land plants (Masucci & Schiefelbein, 1994; Menand *et al.*, 2007; Jang *et al.*, 2011; Kim &  
509 Dolan, 2016; Proust *et al.*, 2016; Kim *et al.*, 2017). Here, we identified a class VIII bHLH  
510 protein (*CbbHLHVIII*) gene from the charophycean alga *C. braunii* that is sister to land plant  
511 RSL genes on protein trees. *CbbHLHVIII* transcripts accumulate at high levels in parts of the  
512 plant undergoing morphogenesis, including the apex, the nodes and the gametangia.  
513 However, the expression of *CbbHLHVIII* was very low in rhizoids and the transcript was  
514 hardly detectable in regions of the plant from which rhizoids develop. This suggests that  
515 *CbbHLHVIII* does not function in rhizoid development in *C. braunii*. This conclusion is  
516 supported by the observation that a single class VIII bHLH protein is also present in the  
517 genome of *C. nitellarum*, which does not develop rhizoids (Pickett-Heaps, 1975; Graham &  
518 Wilcox, 2000). These data support the hypothesis that class VIIIc bHLH proteins carry out  
519 different functions in streptophyte algae and land plants.

520 Further evidence supporting the hypothesis that *CbbHLHVIII* does not control rhizoid  
521 development is its inability to promote rhizoid development when expressed in land plants.  
522 *CbbHLHVIII* does not substitute for loss of RSL class 1 function in land plant *rs1* loss of  
523 function mutants. This indicates that *CbbHLHVIII* is functionally different from land plant RSL  
524 class 1 genes. This finding is further supported by the inability of *CbbHLHVIII* expression to  
525 restore gemma development in *rs1* loss of function mutants of *M. polymorpha*. These results  
526 suggest that RSL class 1 proteins acquired the ability to promote the development of surface  
527 structures from single epidermal cells, including rhizoids, after *C. braunii* and land plants last  
528 shared a common ancestor. If correct, it would suggest that class VIII proteins evolved novel  
529 functions during or after the transition to land. It is possible that these novel functions are  
530 conferred by the RSL motifs that are conserved among all land plant RSL proteins but are  
531 not present in the streptophyte alga (*C. braunii*, *C. nitellarum*) RSL proteins.

532 An alternative, though less parsimonious, hypothesis is that the ancestral function of  
533 class VIII bHLH transcription factors was to control the development of structures from  
534 single cells as it is in land plants, but that this function was lost in both the *C. braunii* and *C.*  
535 *nitellarum* lineages. Ultimately, discovering the function of class VIII bHLH proteins in *Chara*

536 species and *Coleochaete* species requires the functional characterisation of their class VIII  
537 bHLH genes. While such characterisation is not currently possible in these algae it would  
538 demonstrate the ancestral function of these proteins in the last common ancestor using the  
539 comparative approach. The function of RSL class 1 genes in land plants is to control the  
540 development of structures that develop from single surface cells. If class VIII bHLH  
541 transcription factors controlled the development of a similar process in streptophyte algae,  
542 it would suggest that this function was ancestral and likely acted in the last common  
543 ancestor of these organism and land plants. However, the current data suggest that  
544 function of family VIII bHLH transcription factors in the development of streptophyte algae  
545 is entirely different from their function in land plants.

546 Taken together, the data support a model in which there was a single class VIII bHLH  
547 protein in the genome of a streptophyte algal ancestor of the land plants. This gene did not  
548 function in rhizoid development. Neofunctionalization occurred in the lineage leading to the  
549 land plants and was followed by multiple rounds of gene duplication (Pires & Dolan,  
550 2010a,b; Catarino *et al.*, 2016). These duplicated genes control the development of diverse  
551 structures, such as specialised cells and organs derived from single epidermal cells including  
552 rhizoids and root hairs (*RSL* genes) (Masucci & Schiefelbein, 1994; Menand *et al.*, 2007; Jang  
553 *et al.*, 2011; Kim & Dolan, 2016; Proust *et al.*, 2016; Kim *et al.*, 2017) as well as complex  
554 organ development (*HECATE* genes) (Liljegren *et al.*, 2004; Gremski *et al.*, 2007; Kay *et al.*,  
555 2013). This is consistent with the hypothesis that the increase in morphological diversity  
556 that accompanied the colonisation of the land resulted from gene duplication and  
557 neofunctionalisation of ancestral regulatory genes.

558

## 559 **ACKNOWLEDGMENTS**

560 This work was supported by a European Research Council Advanced award  
561 (EVO500 project no. 25028) and a Marie Skłodowska-Curie award  
562 (PLANTORIGINS project no. 238640) to L.D. A.J.H. was supported by a  
563 Biotechnology and Biological Sciences Research Council Doctoral Training  
564 Partnership Scholarship (Grant BB/J014427/1). We are grateful to Pr D. Domozych  
565 (Skidmore College, NY, USA) for providing *C. nitellarum* and, to Pr H. Sakayama  
566 and Pr T. Nishiyama for providing *C. braunii*.

567

568 **AUTHOR CONTRIBUTIONS**

569 L.D. and C.B. designed the research and wrote the paper. C.B. and H.B. produced  
570 the RNA samples for *C. braunii* transcriptome RNAseq. A.J.H. and S.K. performed  
571 *C. braunii* transcriptome assembly. H.B. built the vectors backbones. C.B. and C.C.  
572 performed *M. polymorpha* transformations. C.B. performed all other experiments and  
573 analysed all the data.

574

575 **BIBLIOGRAPHY**

576 **Althoff F, Kopischke S, Zobell O, Ide K, Ishizaki K, Kohchi T, Zachgo S. 2014.** Comparison of  
577 the MpEF1 $\alpha$  and CaMV35 promoters for application in Marchantia polymorpha  
578 overexpression studies. *Transgenic research* **23**: 235–244.

579 **Altschul SF, Gish W, Miller W, Myers EW, Lipman DJ. 1990.** Basic local alignment search  
580 tool. *Journal of molecular biology* **215**: 403–410.

581 **Andrews M. 1987.** Phosphate uptake by the component parts of Chara hispida. *British*  
582 *Phycological Journal* **22**: 49–53.

583 **Bailey TL, Elkan C. 1994.** Fitting a mixture model by expectation maximization to discover  
584 motifs in bipolymers. *Proceedings of the second international Conference on Intelligent*  
585 *systems for molecular biology*. Menlo Park, CA, USA: AAAI Press, 28–36.

586

587 **Banks JA, Nishiyama T, Hasebe M, Bowman JL, Gribskov M, dePamphilis C, Albert VA,**  
588 **Aono N, Aoyama T, Ambrose BA. 2011.** The Selaginella genome identifies genetic changes  
589 associated with the evolution of vascular plants. *Science* **332**: 960–963.

590 **Boetzer M, Henkel C V, Jansen HJ, Butler D, Pirovano W. 2011.** Scaffolding pre-assembled  
591 contigs using SSPACE. *Bioinformatics* **27**: 578–579.

592 **Bolger AM, Lohse M, Usadel B. 2014.** Trimmomatic: a flexible trimmer for Illumina  
593 sequence data. *Bioinformatics* **30**: 2114–2120.

- 594 **Bonnot C, Proust H, Pinson B, Colbalchini FP, Lesly-Veillard A, Breuninger H, Champion C,**  
595 **Hetherington AJ, Kelly S, Dolan L. 2017.** Functional PTB phosphate transporters are present  
596 in streptophyte algae and early diverging land plants. *New Phytologist* **214**: 1158–1171.
- 597 **Bowman JL, Kohchi T, Yamato KT, Jenkins J, Shu S, Ishizaki K, Yamaoka S, Nishihama R,**  
598 **Nakamura Y, Berger F. 2017.** Insights into land plant evolution garnered from the  
599 *Marchantia polymorpha* genome. *Cell* **171**: 287-304. e15.
- 600 **Box RJ. 1986.** Quantitative short-term uptake of inorganic phosphate by the *Chara hispida*  
601 rhizoid. *Plant, Cell & Environment* **9**: 501–506.
- 602 **Box RJ. 1987.** The uptake of nitrate and ammonium nitrogen in *Chara hispida* L.: the  
603 contribution of the rhizoid. *Plant, Cell & Environment* **10**: 169–176.
- 604 **Breuninger H, Thamm A, Streubel S, Sakayama H, Nishiyama T, Dolan L. 2016.**  
605 Diversification of a Transcription Factor Family Led to the Evolution of Antagonistically  
606 Acting Genetic Regulators of Root Hair Growth. *Current Biology* **26**: 1622–1628.
- 607 **Butler J, MacCallum I, Kleber M, Shlyakhter IA, Belmonte MK, Lander ES, Nusbaum C, Jaffe**  
608 **DB. 2008.** ALLPATHS: de novo assembly of whole-genome shotgun microreads. *Genome*  
609 *research* **18**: 810–20.
- 610 **Catarino B, Hetherington AJ, Emms DM, Kelly S, Dolan L. 2016.** The stepwise increase in the  
611 number of transcription factor families in the Precambrian predated the diversification of  
612 plants on land. *Molecular biology and evolution* **33**: 2815–2819.
- 613 **Chanderbali AS, He F, Soltis PS, Soltis DE. 2015.** Out of the water: origin and diversification  
614 of the LBD gene family. *Molecular biology and evolution* **32**: 1996–2000.
- 615 **Czechowski T, Stitt M, Altmann T, Udvardi MK, Scheible W-R. 2005.** Genome-wide  
616 identification and testing of superior reference genes for transcript normalization in  
617 *Arabidopsis*. *Plant physiology* **139**: 5–17.
- 618 **Datta S, Prescott H, Dolan L. 2015.** Intensity of a pulse of RSL4 transcription factor synthesis  
619 determines *Arabidopsis* root hair cell size. *Nature Plants* **1**: 15138.

- 620 **Delaux P-M, Nanda AK, Mathé C, Sejalon-Delmas N, Dunand C. 2012.** Molecular and  
621 biochemical aspects of plant terrestrialization. *Perspectives in Plant Ecology, Evolution and*  
622 *Systematics* **14**: 49–59.
- 623 **Floyd SK, Bowman JL. 2007.** The ancestral developmental tool kit of land plants.  
624 *International journal of plant sciences* **168**: 1–35.
- 625 **Forsberg C. 1965.** Nutritional studies of Chara in axenic cultures. *Physiologia Plantarum* **18**:  
626 275–290.
- 627 **Gibling MR, Davies NS. 2012.** Palaeozoic landscapes shaped by plant evolution. *Nature*  
628 *Geoscience* **5**: 99.
- 629 **Graham LE, Cook ME, Busse JS. 2000.** The origin of plants: body plan changes contributing  
630 to a major evolutionary radiation. *Proc Natl Acad Sci USA* **97**.
- 631 **Graham LE, Wilcox LW. 2000.** *Algae*. Prentice-Hall, Inc.
- 632 **Gremski K, Ditta G, Yanofsky MF. 2007.** The HECATE genes regulate female reproductive  
633 tract development in Arabidopsis thaliana. *Development* **134**: 3593–3601.
- 634 **Guindon S, Dufayard J-F, Lefort V, Anisimova M, Hordijk W, Gascuel O. 2010.** New  
635 algorithms and methods to estimate maximum-likelihood phylogenies: assessing the  
636 performance of PhyML 3.0. *Systematic biology* **59**: 307–321.
- 637 **Heim MA, Jakoby M, Werber M, Martin C, Weisshaar B, Bailey PC. 2003.** The basic helix–  
638 loop–helix transcription factor family in plants: a genome-wide study of protein structure  
639 and functional diversity. *Molecular biology and evolution* **20**: 735–747.
- 640 **Honkanen S, Dolan L. 2016.** Growth regulation in tip-growing cells that develop on the  
641 epidermis. *Current opinion in plant biology* **34**: 77–83.
- 642 **Hori K, Maruyama F, Fujisawa T, Togashi T, Yamamoto N, Seo M, Sato S, Yamada T, Mori**  
643 **H, Tajima N. 2014.** Klebsormidium flaccidum genome reveals primary factors for plant  
644 terrestrial adaptation. *Nature communications* **5**.

- 645 **Huang X, Madan A. 1999.** CAP3: A DNA sequence assembly program. *Genome research* **9**:  
646 868–877.
- 647 **Ishizaki K, Chiyoda S, Yamato KT, Kohchi T. 2008.** Agrobacterium-mediated transformation  
648 of the haploid liverwort *Marchantia polymorpha* L., an emerging model for plant biology.  
649 *Plant and cell physiology* **49**: 1084–1091.
- 650 **Jang G, Yi K, Pires ND, Menand B, Dolan L. 2011.** RSL genes are sufficient for rhizoid system  
651 development in early diverging land plants. *Development* **138**: 2273–2281.
- 652 **Harrison JC. 2017.** Development and genetics in the evolution of land plant body plans.  
653 *Philosophical Transactions of the Royal Society B: Biological Sciences* **372**: 20150490.
- 654 **Jones VAS, Dolan L. 2012.** The evolution of root hairs and rhizoids. *Annals of botany* **110**:  
655 205–212.
- 656 **Jones DT, Taylor WR, Thornton JM. 1992.** The rapid generation of mutation data matrices  
657 from protein sequences. *Bioinformatics* **8**: 275–282.
- 658 **Ju C, Van de Poel B, Cooper ED, Thierer JH, Gibbons TR, Delwiche CF, Chang C. 2015.**  
659 Conservation of ethylene as a plant hormone over 450 million years of evolution. *Nature*  
660 *Plants* **1**: 14004.
- 661 **Katoh K, Frith MC. 2012.** Adding unaligned sequences into an existing alignment using  
662 MAFFT and LAST. *Bioinformatics* **28**: 3144.
- 663 **Katoh K, Kuma K, Toh H, Miyata T. 2005.** MAFFT version 5: improvement in accuracy of  
664 multiple sequence alignment. *Nucleic acids research* **33**: 511–518.
- 665 **Katoh K, Standley DM. 2013.** MAFFT multiple sequence alignment software version 7:  
666 improvements in performance and usability. *Molecular biology and evolution* **30**: 772–780.
- 667 **Kay P, Groszmann M, Ross JJ, Parish RW, Swain SM. 2013.** Modifications of a conserved  
668 regulatory network involving INDEHISCENT controls multiple aspects of reproductive tissue  
669 development in *Arabidopsis*. *New Phytologist* **197**: 73–87.

- 670 **Kenrick P, Crane PR. 1997.** *The origin and early diversification of land plants. Nature* **389**:  
671 33-39.
- 672 **Kim CM, Dolan L. 2016.** ROOT HAIR DEFECTIVE SIX-LIKE class I genes promote root hair  
673 development in the grass *Brachypodium distachyon*. *PLoS genetics* **12**: e1006211.
- 674 **Kim CM, Han C, Dolan L. 2017.** RSL class I genes positively regulate root hair development in  
675 *Oryza sativa*. *New Phytologist* **213**: 314–323.
- 676 **Kopylova E, Noe L, Touzet H. 2012.** SortMeRNA: fast and accurate filtering of ribosomal  
677 RNAs in metatranscriptomic data. *Bioinformatics* **28**: 3211–3217.
- 678 **Kubota A, Ishizaki K, Hosaka M, Kohchi T. 2013.** Efficient *Agrobacterium*-mediated  
679 transformation of the liverwort *Marchantia polymorpha* using regenerating thalli.  
680 *Bioscience, biotechnology, and biochemistry* **77**: 167–172.
- 681 **Lang D, Weiche B, Timmerhaus G, Richardt S, Riaño-Pachón DM, Corrêa LG, Reski R,  
682 Mueller-Roeber B, Rensing SA. 2010.** Genome-wide phylogenetic comparative analysis of  
683 plant transcriptional regulation: a timeline of loss, gain, expansion, and correlation with  
684 complexity. *Genome Biology and Evolution* **2**: 488–503.
- 685 **Lehti-Shiu MD, Panchy N, Wang P, Uygun S, Shiu S-H. 2017.** Diversity, expansion, and  
686 evolutionary novelty of plant DNA-binding transcription factor families. *Biochimica et*  
687 *Biophysica Acta (BBA)-Gene Regulatory Mechanisms* **1860**: 3–20.
- 688 **Lenton TM, Crouch M, Johnson M, Pires N, Dolan L. 2012.** First plants cooled the  
689 Ordovician. *Nature Geoscience* **5**: 86–89.
- 690 **Liljegren SJ, Roeder AH, Kempin SA, Gremski K, Østergaard L, Guimil S, Reyes DK, Yanofsky  
691 MF. 2004.** Control of Fruit Patterning in *Arabidopsis* by INDEHISCENT. *Cell* **116**: 843–853.
- 692 **Masucci JD, Schiefelbein JW. 1994.** The *rhd6* mutation of *Arabidopsis thaliana* alters root-  
693 hair initiation through an auxin-and ethylene-associated process. *Plant Physiology* **106**:  
694 1335–1346.

- 695 **Menand B, Yi K, Jouannic S, Hoffmann L, Ryan E, Linstead P, Schaefer DG, Dolan L. 2007.**  
696 An ancient mechanism controls the development of cells with a rooting function in land  
697 plants. *Science* **316**: 1477.
- 698 **Navaud O, Dabos P, Carnus E, Tremousaygue D, Hervé C. 2007.** TCP transcription factors  
699 predate the emergence of land plants. *Journal of molecular evolution* **65**: 23–33.
- 700 **Nichols HW. 1973.** Growth media-freshwater. *Handbook of phycological methods: culture*  
701 *methods and growth measurements* **1**: 39–78.
- 702 **Nikolenko SI, Korobeynikov AI, Alekseyev MA. 2013.** BayesHammer: Bayesian clustering for  
703 error correction in single-cell sequencing. *BMC Genomics* **14**: S7.
- 704 **Nishiyama T, Sakayama H, de Vries J, Buschmann H, Saint-Marcoux D, Ullrich KK, Haas FB,**  
705 **Vanderstraeten L, Becker D, Lang D. 2018.** The chara genome: Secondary complexity and  
706 implications for plant terrestrialization. *Cell* **174**: 448-464. e24.
- 707 **Patro R, Duggal G, Love MI, Irizarry RA, Kingsford C. 2017.** Salmon provides fast and bias-  
708 aware quantification of transcript expression. *Nature Methods* **14**: 417–419.
- 709 **Pickett-Heaps JD. 1975.** *Green algae: structure, reproduction and evolution in selected*  
710 *genera*. Mass., Sinauer Associates.
- 711 **Pires N, Dolan L. 2010a.** Origin and diversification of basic-helix-loop-helix proteins in  
712 plants. *Molecular biology and evolution* **27**: 862–874.
- 713 **Pires N, Dolan L. 2010b.** Early evolution of bHLH proteins in plants. *Plant signaling &*  
714 *behavior* **5**: 911–912.
- 715 **Pires ND, Dolan L. 2012.** Morphological evolution in land plants: new designs with old  
716 genes. *Philosophical Transactions of the Royal Society B: Biological Sciences* **367**: 508–518.
- 717 **Prince VE, Pickett FB. 2002.** Splitting pairs: the diverging fates of duplicated genes. *Nature*  
718 *Reviews Genetics* **3**: 827-837.



- 719 **Proust H, Honkanen S, Jones VAS, Morieri G, Prescott H, Kelly S, Ishizaki K, Kohchi T, Dolan**  
720 **L. 2016.** RSL Class I Genes Controlled the Development of Epidermal Structures in the  
721 Common Ancestor of Land Plants. *Current Biology* **26**: 93–99.
- 722 **Rensing SA. 2014.** Gene duplication as a driver of plant morphogenetic evolution. *Current*  
723 *Opinion in Plant Biology* **17**: 43–48.
- 724 **Rensing SA, Lang D, Zimmer AD, Terry A, Salamov A, Shapiro H, Nishiyama T, Perroud P-F,**  
725 **Lindquist EA, Kamisugi Y. 2008.** The Physcomitrella genome reveals evolutionary insights  
726 into the conquest of land by plants. *Science* **319**: 64–69.
- 727 **Saint-Marcoux D, Proust H, Dolan L, Langdale JA. 2015.** Identification of Reference Genes  
728 for Real-Time Quantitative PCR Experiments in the Liverwort *Marchantia polymorpha*. *PLoS*  
729 *one* **10**: e0118678.
- 730 **Simpson JT, Durbin R. 2012.** Efficient de novo assembly of large genomes using compressed  
731 data structures. *Genome Research* **22**: 549–556.
- 732 **Smith DM, Allen SJ. 1955.** *Cryptogamic botany*. McGraw-Hill Book company.
- 733 **Tanabe Y, Hasebe M, Sekimoto H, Nishiyama T, Kitani M, Henschel K, Münster T, Theissen**  
734 **G, Nozaki H, Ito M. 2005.** Characterization of MADS-box genes in charophycean green algae  
735 and its implication for the evolution of MADS-box genes. *Proceedings of the National*  
736 *Academy of Sciences of the United States of America* **102**: 2436–2441.
- 737 **Vermeer CP, Escher M, Portielje R, de Klein JJ. 2003.** Nitrogen uptake and translocation by  
738 *Chara*. *Aquatic Botany* **76**: 245–258.
- 739 **Vijayakumar P, Datta S, Dolan L. 2016.** ROOT HAIR DEFECTIVE SIX-LIKE4 (RSL4) promotes  
740 root hair elongation by transcriptionally regulating the expression of genes required for cell  
741 growth. *New Phytologist* **212**: 944–953.
- 742 **Walker BJ, Abeel T, Shea T, Priest M, Abouelliel A, Sakthikumar S, Cuomo CA, Zeng Q,**  
743 **Wortman J, Young SK, et al. 2014.** Pilon: an integrated tool for comprehensive microbial  
744 variant detection and genome assembly improvement. *PLoS one* **9**: e112963.

745 **Wickett NJ, Mirarab S, Nguyen N, Warnow T, Carpenter E, Matasci N, Ayyampalayam S,**  
746 **Barker MS, Burleigh JG, Gitzendanner MA. 2014.** Phylotranscriptomic analysis of the origin  
747 and early diversification of land plants. *Proceedings of the National Academy of Sciences*  
748 **111:** E4859–E4868.

749 **Wodniok S, Brinkmann H, Glöckner G, Heidel A, Philippe H, Melkonian M, Becker B. 2011.**  
750 Origin of land plants: Do conjugating green algae hold the key? *BMC Evolutionary Biology*  
751 **11:** 104-114.

752 **Wuestenberg A, POERS Y, Ehwald R. 2011.** Culturing of stoneworts and submersed  
753 angiosperms with phosphate uptake exclusively from an artificial sediment. *Freshwater*  
754 *Biology* **56:** 1531–1539.

755 **Zhang X, Henriques R, Lin S-S, Niu Q-W, Chua N-H. 2006.** Agrobacterium-mediated  
756 transformation of *Arabidopsis thaliana* using the floral dip method. *Nature protocols* **1:** 641-  
757 646.

758

759

760

761

762

763

764

765

766

767

768

769

770

771

772 **Table 1. List of primers for cloning, vector construction and expression analysis**

| Experiment                 | Gene Name                       | Forward (F) & Reverse (R) primer sequences          |
|----------------------------|---------------------------------|-----------------------------------------------------|
| CDS verification           | <i>CnbHLHVIII</i>               | F: CTGAGTACCGTATCTGTCTCACTTTGG                      |
|                            |                                 | R: GTAGTCCCTATCAAGCGTCGGTGC                         |
|                            | <i>CbbHLHVIII</i>               | F: GAGAGAAGCCTAGAGGATGCTTCC                         |
|                            |                                 | R: CGTTTGATCAAGCGACGTTGAGC                          |
| Cloning                    | <i>MpALSm</i>                   | F: AAATCTATCTCTCTCGAGCATGGCGTCAATTAGTGGATGC         |
|                            |                                 | R: ACATTATTATGGAGAAACAAGTTAGTATATAGTCCTTCCATC       |
|                            | <i>MpEF1<math>\alpha</math></i> | F: ATGATACGAACGAAAGCTCCGGGGCACATCAACTGTTGAGGCAACACC |
|                            |                                 | R: TGACGCCATGCTCGAGAGAGATAGATTTGTAGAGAGAG           |
|                            | <i>CnbHLHVIII</i>               | F: AGCCAAGATGTCAACACAGCAGG                          |
|                            |                                 | R: GTAGTCCCTATCAAGCGTCGGTGC                         |
|                            | <i>CbbHLHVIII</i>               | F: ATGAACAGTGTGGTGGCGGAGG                           |
|                            |                                 | R: CTAACGATGCGTTCTTGGGGATG                          |
|                            | <i>MpRSL1</i>                   | F: ATGATGAGCTCGAGAACGCTGA                           |
|                            |                                 | R: TCAGGACGAGTTGTTGTCTGCTTG                         |
|                            | <i>AtRHD6</i>                   | F: ATGGCACTCGTTAATGACCATCC                          |
|                            |                                 | R: TTAATTGGTGATCAGATTCGAATTCC                       |
| Quantitative-PCR analysis  | <i>CbbHLHVIII*</i>              | F: CAGAAGCAGAGCCAAGAGGAGC                           |
|                            |                                 | R: CTAACGATGCGTTCTTGGGGATG                          |
|                            | <i>CbELF5A</i>                  | F: CTAGCCAATCAGCTGAAGGAAGG                          |
|                            |                                 | R: TCAGCAAACCCTCTACATGGTGC                          |
|                            | <i>MpRSL1</i>                   | F: AGATGAGTCTGGGGCAACC                              |
|                            |                                 | R: GGATGAGCGCTTTAGAGTGG                             |
|                            | <i>MpCUL<sup>#</sup></i>        | F: AGGATGTGGACAAGGATAGACG                           |
|                            |                                 | R: GTTGATGTGGCAACACCTTG                             |
|                            | <i>MpACT</i>                    | F: AGGCATCTGGTATCCACGAG                             |
|                            |                                 | R: ACATGGTCGTTCTCCAGAC                              |
|                            | <i>AtRHD6</i>                   | F: CCTAAATCCGCTGGAAACAA                             |
|                            |                                 | R: CTCTTCGATTCTTGGCTGCT                             |
| <i>AtUBQ10<sup>#</sup></i> | F: GGCCTTGATAATCCCTGATGAATAAG   |                                                     |
|                            | R: AAAGAGATAACAGGAACGGAAACATAG  |                                                     |
| <i>AtPDF2</i>              | F: TAACGTGGCCAAAATGATGC         |                                                     |
|                            | R: GTTCTCCACAACCGCTTGGT         |                                                     |
| RT-PCR analysis            | <i>MpRSL1</i>                   | F: ACTCTCGGGAATGACACTTCCAGG                         |
|                            |                                 | R: CCTTTTCAAGCATGGTGACCAAGTC                        |
|                            | <i>AtRHD6</i>                   | F: TCAACCGTCGAAGAACTGAG                             |
|                            |                                 | R: TTAATTGGTGATCAGATTCGAATTCC                       |
| <i>AtRSL1</i>              | F: CCCTAAACTGGCTGGCAATA         |                                                     |

R: TTATTCTGCTATACTTGTCTCTAGTTGAG

773 \* Annealing step at 65°C instead of 60°C; # Also used for RT-PCR analysis.

774

775

776

777 **Table 2. Transcriptome parameters**

|                          |                   |
|--------------------------|-------------------|
| Number of sequences      | 117611            |
| Median sequence length   | 395 nucleotides   |
| Mean sequence length     | 749 nucleotides   |
| Max sequence length      | 21672 nucleotides |
| Min sequence length      | 200 nucleotides   |
| No. sequences > 1kb      | 21917             |
| No. sequences > 10kb     | 63                |
| No. gaps                 | 660               |
| N50                      | 1229              |
| Combined sequence length | 88124568          |

778

779 **Figure 1. CbbHLHVIII is sister to land plant class VIII bHLH transcription factors.**

780 **a.** Unrooted maximum-likelihood tree of the Archaeplastida bHLH transcription factors. The,  
781 the complete class VIII bHLH family including the RSL (subclass VIIIc; in red) and related  
782 bHLH families (class X, XV, XIII and XIV) are marked with ellipses. CbbHLHVIII and CnbHLHVIII  
783 are marked with red and a blue triangle respectively. **b.** Maximum-likelihood tree of the  
784 class VIII bHLH transcription factors. Tree rooted with the bHLH class XIII and XIV sequences.  
785 The approximate likelihood ratio test (aLRT) support values are given for the major nodes of  
786 the tree and marked by a red circle. The red and the blue triangles mark CbbHLHVIII and  
787 CnbHLHVIII respectively. *A. thaliana* (At), *O. sativa* (Os), *S. moelendorffii* (Sm), *P. patens* (Pp)  
788 and *M. polymorpha* (Mp).

789

790 **Figure 2. Conserved amino acid motifs of the class VIII bHLH family.**

791 **a.** LOGO representation of the amino acid sequence of the atypical bHLH domain of class VIII  
792 proteins. The red star marks the position of the conserved Alanine (A<sup>210</sup> in AtRHD6) specific  
793 of the class VIII bHLH proteins. **b.** LOGO representations of the amino acid sequences of the  
794 conserved motifs of the class VIII bHLH subclasses. **c.** Position of the conserved class VIII  
795 bHLH amino acid domains in the land plant class VIII proteins and CbbHLHVIII and  
796 CnbHLHVIII. Class VIII bHLH domain (green box), HECATE domain (purple box), RSL domains

797 (blue boxes). The sequence of the *C. braunii* and *C. nitellarum* bHLH domains are given. Red  
798 stars mark the position of the conserved Alanine (A<sup>210</sup> in AtRHD6).

799

800 **Figure 3. *CbbHLHVIII* expression does not restore root hair development on root hairless**  
801 ***Arabidopsis thaliana* *Atrhd6 Atrsl1* mutants.**

802 **a.** Histograms showing the mean steady state levels ( $n=3$ ) of *AtRHD6*, *MpRSL1* and  
803 *CbbHLHVIII* mRNA in *Arabidopsis thaliana* wild type (WT), *Atrhd6 Atrsl1* double mutants and  
804 *Atrhd6 Atrsl1* double mutants transformed with *p35S:AtRHD6:T* (*AtRHD6*), *p35S:MpRSL1:T*  
805 (*MpRSL1*) or *p35S:CbbHLHVIII:T* (*CbbHLHVIII*). L1, L2 and L3 are three independently  
806 transformed lines for each transgene. Transcripts levels were normalized to *AtUBQ10* and  
807 *AtPDF2* mRNA levels. Each biological replicate is represented by a square, a triangle and a  
808 diamond for replicate 1, replicate 2 and replicate 3, respectively. In some lines the  
809 expression of *CbbHLHVIII* was not detected (nd). Different letters refers to statistically  
810 different groups ( $P<0,05$ , Kruskal-Wallis test). **b.** Analysis of the presence or absence of  
811 *AtRHD6* and *AtRSL1* transcripts by RT-PCR in *Arabidopsis thaliana* wild type (WT), *Atrhd6*  
812 *Atrsl1* double mutants and *Atrhd6 Atrsl1* double mutants transformed with *p35S:AtRHD6:T*  
813 (*AtRHD6*), *p35S:MpRSL1:T* (*MpRSL1*) or *p35S:CbbHLHVIII:T* (*CbbHLHVIII*) constructs. L1, L2  
814 and L3 are three independently transformed lines for each transgene. *AtUBQ10* is used as a  
815 reference gene. **c.** Root hair phenotypes of *Arabidopsis thaliana* wild type (WT), *Atrhd6*  
816 *Atrsl1* double mutant and three independent lines (L1, L2, L3) for each of the *Atrhd6 Atrsl1*  
817 double mutants transformed with *p35S:AtRHD6:T*, *p35S:MpRSL1:T* or *p35S:CbbHLHVIII:T*  
818 constructs. Scale bars : 1 mm.

819

820 **Figure 4. *CbbHLHVIII* expression in *Marchantia polymorpha* *Mprsl1* mutants.**

821 **a.** Histograms showing the mean steady state levels ( $n=3$ ) of *AtRHD6*, *MpRSL1* and  
822 *CbbHLHVIII* mRNA in *M. polymorpha* wild type male (Tak-1) and female (Tak-2), *Mprsl1*  
823 mutant (m) and *Mprsl1* mutants transformed with *pMpEF1 $\alpha$ :MpRSL1:T* (*MpRSL1*) or  
824 *pMpEF1 $\alpha$ :CbbHLHVIII:T* (*CbbHLHVIII*). For each construct, L1, L2 and L3 are three  
825 independently transformed lines. Transcripts levels were normalized to *MpACT* and *MpCUL*  
826 mRNA levels. Each biological replicate is represented by a square, a triangle and a diamond  
827 for replicate 1, replicate 2 and replicate 3, respectively. *CbbHLHVIII* was not detected (nd) in  
828 some lines. Different letters refers to statistically different groups ( $P<0,05$ , Kruskal-Wallis

829 test). **b.** Analysis of the presence or absence of MpRSL1 transcript by RT-PCR in *Marchantia*  
830 *polymorpha* wild type male (Tak-1) and female (Tak-2), Mprs1 mutant (m) and Mprs1  
831 mutants transformed with pMpEF1 $\alpha$ :MpRSL1:T (MpRSL1) and pMpEF1 $\alpha$ :CbbHLHVIII:T  
832 (CbbHLHVIII). MpCUL is the reference gene. L1, L2 and L3 are three independently  
833 transformed lines.

834

835 **Figure 5. CbbHLHVIII expression in *M. polymorpha* Mprs1 mutants does not restore**  
836 **rhizoid and gemmae development.**

837 Rhizoid and gemma cup phenotypes of wild type male (Tak-1) and female (Tak-2) *M.*  
838 *polymorpha*, Mprs1 mutants and three independent lines (L1, L2, L3) of Mprs1 mutants  
839 transformed with pMpEF1 $\alpha$ :MpRSL1:T or pMpEF1 $\alpha$ :CbbHLHVIII:T. For each genotype the  
840 top image represents the rhizoid phenotype of regenerated thalli seven weeks after  
841 transformation. Scale bars: 3 mm. The bottom images are the gemma cups of regenerated  
842 thalli ten weeks after transformation. White arrows indicate gemma cups full of gemmae. #  
843 indicates empty gemma cups. Scale bars: 2 mm.

844

845 **Figure 6. Expression of CbbHLHVIII in *Marchantia polymorpha* does not induce**  
846 **supernumerary rhizoid development.**

847 **a.** Histograms showing the steady state level of MpRSL1 and CbbHLHVIII mRNA in *M.*  
848 *polymorpha* wild type male (Tak-1) and female (Tak-2) and wild type *M. polymorpha*  
849 transformed with p35S:CbbHLHVIII:T (CbbHLHVIII) or p35S:MpRSL1:T (MpRSL1). For each  
850 construct, five lines (L1, L2, L3, L4 and L5) were independently transformed. Transcripts  
851 levels were normalized with the geometrical mean of MpACT and MpCUL expression levels.  
852 In some lines the expression of CbbHLHVIII was not detected (nd). Different letters refers to  
853 statistically different groups (P<0,05, Kruskal-Wallis test). **b.** Rhizoid phenotypes of *M.*  
854 *polymorpha* WT male (Tak-1) and female (Tak-2) and *M. polymorpha* wild type transformed  
855 with p35S:MpRSL1:T or p35S:CbbHLHVIII:T. Plants are four weeks old thalli grown from  
856 spores that were transformed with transgenes. Scale bars: 3 mm.

857

858 **Figure 7. Rhizoids develop on *Chara braunii* nodal complexes.**

859 **a.** *C. braunii* thallus. (a) Nodal complexes on the main axis of the thallus are framed in white.  
860 A star indicates the unicellular internodes of the main axis of the thallus. White arrowheads

861 indicate the new lateral axes that developed from nodal complexes. (b) *C. braunii* rhizoids  
 862 (rh) growing from a nodal complexes. (c),(d) and (e) White stars mark the internodal cells  
 863 on both sides of the multicellular nodes. Branches (br), new axes (white arrowheads) and  
 864 rhizoids (rh) develop from the nodal complexes. Red arrowheads indicate where each  
 865 rhizoid is attached to the nodal complex. Scale bars: 1 mm (a) and (b), 250  $\mu$ m (c), (d) and  
 866 (e). Branches were removed in (d) and (e) to reveal the site where rhizoids and branches  
 867 attach to the node. **b.** Percentages of nodes of different developmental stages bearing  
 868 rhizoids at different developmental stage (Initiating, elongating, multicellular, branched).  $N_1$   
 869 are the first nodes below the apical meristem,  $N_2$  are the second,  $N_3$  are the third,  $N_4$  are the  
 870 fourth and  $N_{older}$  are the fifth and older. **c.** Schematic of a *C. braunii* axis showing branches  
 871 attached to the nodes, rhizoids (in brown), new axes (in blue) and apical meristems (in red).  
 872

873 **Figure 8. CbbHLHVIII mRNA is expressed in morphogenetic centres.**

874 **a.** Histograms showing the mean steady state levels (n=3) of *CbbHLHVIII* mRNA in *C. braunii*  
 875 thallus (th), rhizoids (rh), gametangia (ga) and zygotes (zy). Transcripts levels were  
 876 normalized with *CbELF5a* expression. Each biological replicate is represented by a square, a  
 877 triangle and a diamond for replicate 1, replicate 2 and replicate 3, respectively. Different  
 878 letters refer to statistically different groups ( $P < 0,05$ , Kruskal-Wallis test). **b.** Histogram  
 879 showing the mean steady state level of *CbbHLHVIII* mRNA in different regions of the *C.*  
 880 *braunii* thallus: the apex (apical cells and first nodal complex; ap), nodes 2 ( $N_2$ ), nodes 3  
 881 ( $N_3$ ), older nodes ( $N_{older}$ ), branches (br) and branches bearing gametangia (br+ga). Transcript  
 882 levels were normalized to *CbELF5a* mRNA levels. Each biological replicate is represented by  
 883 a square, a triangle and a diamond for replicate 1, replicate 2 and replicate 3, respectively.  
 884 Different letters refers to statistically different groups ( $P < 0,05$ , Kruskal-Wallis test).

885

886 **Supplementary Table 1. Expression of Cb\_Transcript\_119934 (CbbHLHVIII) in the**  
 887 **transcriptome.**

| Libraries            | Expression level (TPM) |      |      |      |      |      |      |      |
|----------------------|------------------------|------|------|------|------|------|------|------|
|                      | Th1                    | Th 2 | Rh1  | Rh2  | Rh3  | Rh4  | WP1  | WP2  |
| Cb_Transcript_119934 | 0.95                   | 2.10 | 0.04 | 0.00 | 0.15 | 0.01 | 0.39 | 1.51 |

888 Expression level in Transcript Per Million (TPM) of the *CbbHLHVIII* transcript  
 889 (*Cb\_Transcript\_119934*) in the different libraries used for the transcriptome (two green  
 890 thallus (Th) libraries, four rhizoids libraries (Rh) and two whole plants libraries (WP)).  
 891

892 **Supplementary Data 1. Transcript, CDS and amino acid sequences of *CbbHLHVIII* and**  
893 ***CnbHLHVIII*.**

894

895 **Supplementary Data 2. Amino acid alignment of the Archaeplastida bHLH transcription**  
896 **factors.**

897

898 **Supplementary Data 3. Trimmed amino acid alignment used for the phylogenetic analysis**  
899 **of the Archaeplastida bHLH transcription factors.**

900

901 **Supplementary Data 4. Trimmed amino acid alignment used for the phylogenetic analysis**  
902 **of the class VIII bHLH transcription factors.**

903

904 **Supplementary Figure S1. Unrooted maximum-likelihood tree of Archeplastida bHLH**  
905 **transcription factors.**

906 *CbbHLHVIII* and *CnbHLHVIII* in the class VIII bHLH family are highlighted respectively with a  
907 red and a blue triangle. The approximate likelihood ratio test (aLRT) support values are  
908 included at nodes. The tree includes sequences from the land plants *Arabidopsis thaliana*  
909 (*At*), *Oryza sativa* (*Os*), *Selaginella moelendorffii* (*Sm*), *Phycomitrella patens* (*Pp*) and  
910 *Marchantia polymorpha* (*Mp*); the streptophyte algae *C. braunii*, *C. nitellarum* and  
911 *Klebsormidium flaccidum* (*Kf*), the chlorophyte algae *Volvox carteri* (*Vc*), *Chlamydomonas*  
912 *reinhardtii* (*Cr*), *Chlorella variabilis* (*Cv*), *Ostreococcus tauri* (*Ot*); the rodophyte alga  
913 *Cyanidioschyzon merolae* (*Cm*).

914

915 **Supplementary Figure S2. Maximum-likelihood tree of the class VIII bHLH transcription**  
916 **factors.**

917 The class VIII bHLH tree is rooted with the bHLH class XIII and XIV families. It includes  
918 sequences from the land plants *Arabidopsis thaliana* (*At*), *Oryza sativa* (*Os*), *Selaginella*  
919 *moelendorffii* (*Sm*), *Phycomitrella patens* (*Pp*) and *Marchantia polymorpha* (*Mp*);  
920 streptophyte algae *C. braunii*, *C. nitellarum* and *Klebsormidium flaccidum* (*Kf*); the  
921 chlorophyte algae *Volvox carteri* (*Vc*), *Chlamydomonas reinhardtii* (*Cr*), *Chlorella variabilis*  
922 (*Cv*) and *Ostreococcus tauri* (*Ot*); and the rodophyte alga *Cyanidioschyzon merolae* (*Cm*).

923 The positions of *CbbHLHVIII* and *CnbHLHVIII* in the class VIII bHLH family are indicated



924 respectively with a blue and a red triangle. The approximate likelihood ratio test (aLRT)  
925 support values are included at nodes.

926

927 **Supplementary Figure S3. Conserved domains of the bHLH family VIII proteins.**

928 Location and amino acid sequences of the conserved domains in the class VIII bHLH  
929 proteins. The conserved domains are framed in black (bHLH domain), purple (HECATE  
930 domain), light blue (RSL class 1/VIIIc1), grey blue (RSL class 2/VIIIc2) and navy blue (RSL class  
931 3/VIIIc3). The red star marks the position of the conserved Alanine (A<sup>210</sup> in AtRHD6).

932

933 **Supplementary Figure S4. LOGO representation of the conserved amino acid sequences of**  
934 **the bHLH domain of class X, XIII, XIV and XV proteins.**

935

936 **Supplementary Figure S5. Rhizoid development on *C. braunii*.**

937 Rhizoid developmental stages. (a) Initiating rhizoid indicated with a red arrowhead. (b)  
938 Elongating rhizoid. (c) Multicellular rhizoid with cell walls indicated with an arrowhead. (d)  
939 Branched rhizoid. Scale bars: 250  $\mu$ m.

940

941 **Supplementary Figure S6. *C. braunii* gametangia and zygotes.**

942 (a) and (b) *C. braunii* gametangia (archegonia (ar) and anteridia (an)) develop on the  
943 branches (br). (c) and (d) Zygote (zy) retained on the branches (br). Scale bars : 500  $\mu$ m (a)  
944 and (d) and 250  $\mu$ m (b) and (c).

945

Figure 1.

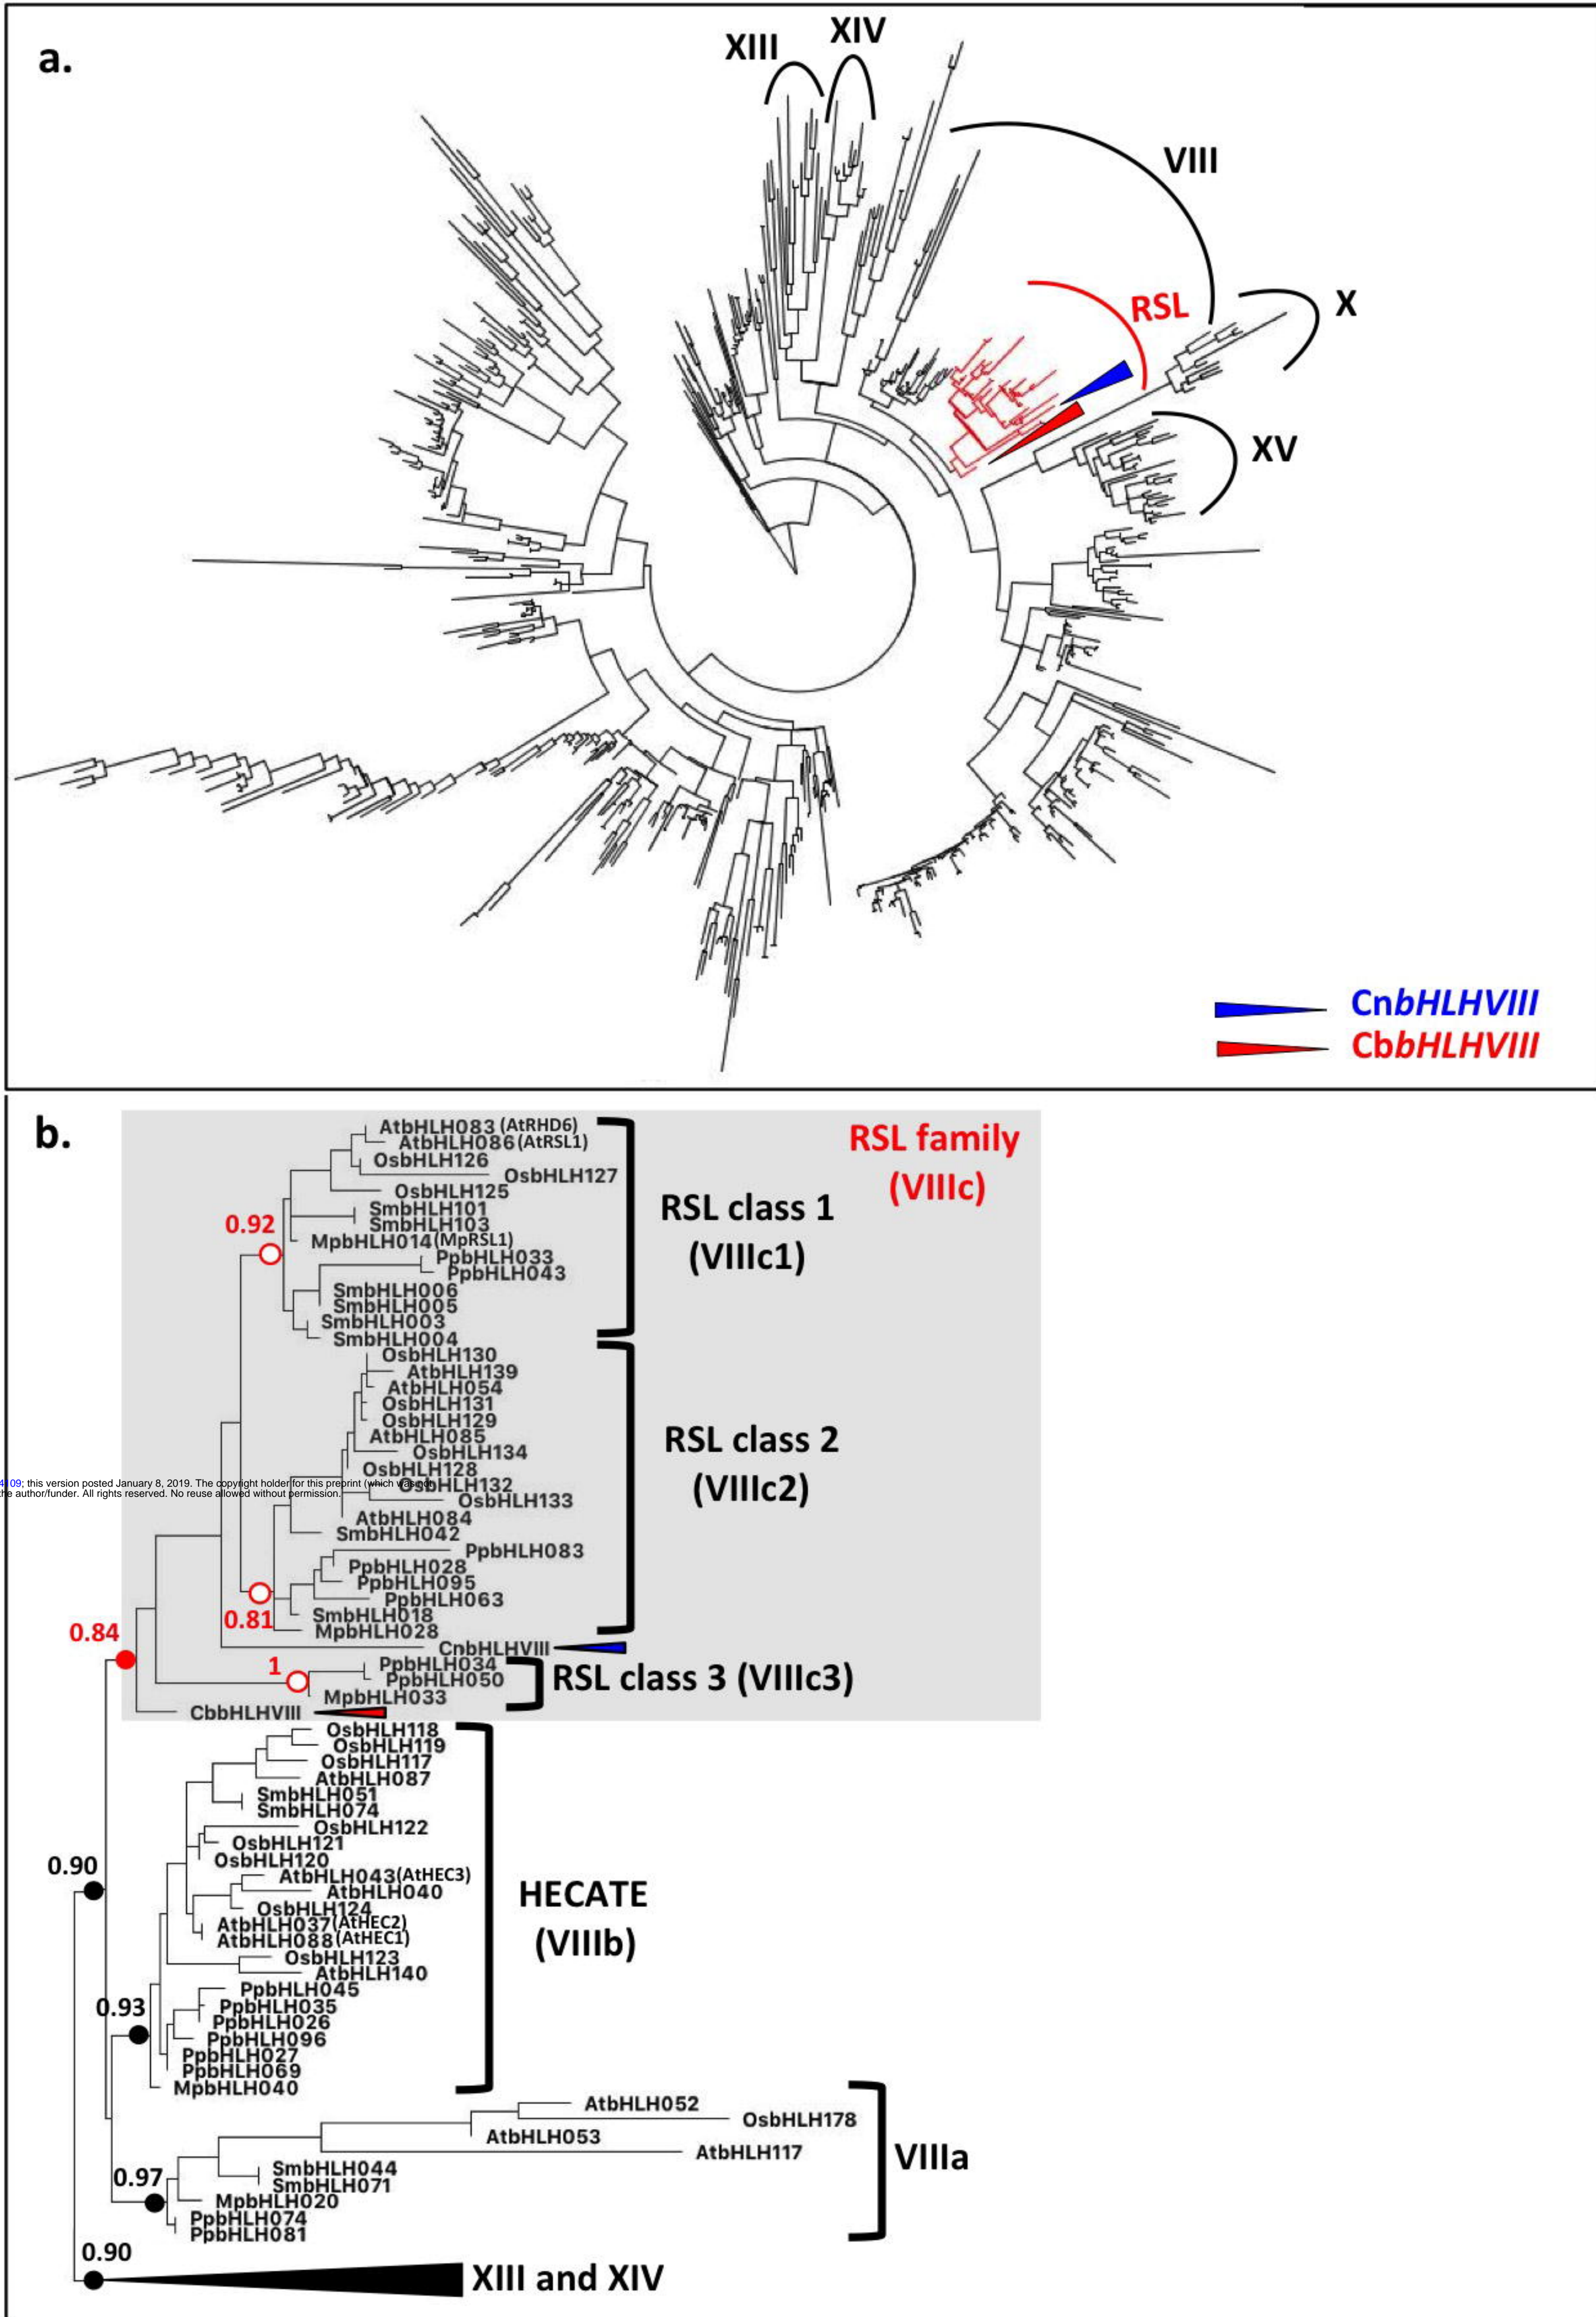

bioRxiv preprint doi: <https://doi.org/10.1101/514109>; this version posted January 8, 2019. The copyright holder for this preprint (which was not certified by peer review) is the author/funder. All rights reserved. No reuse allowed without permission.



Figure 2.

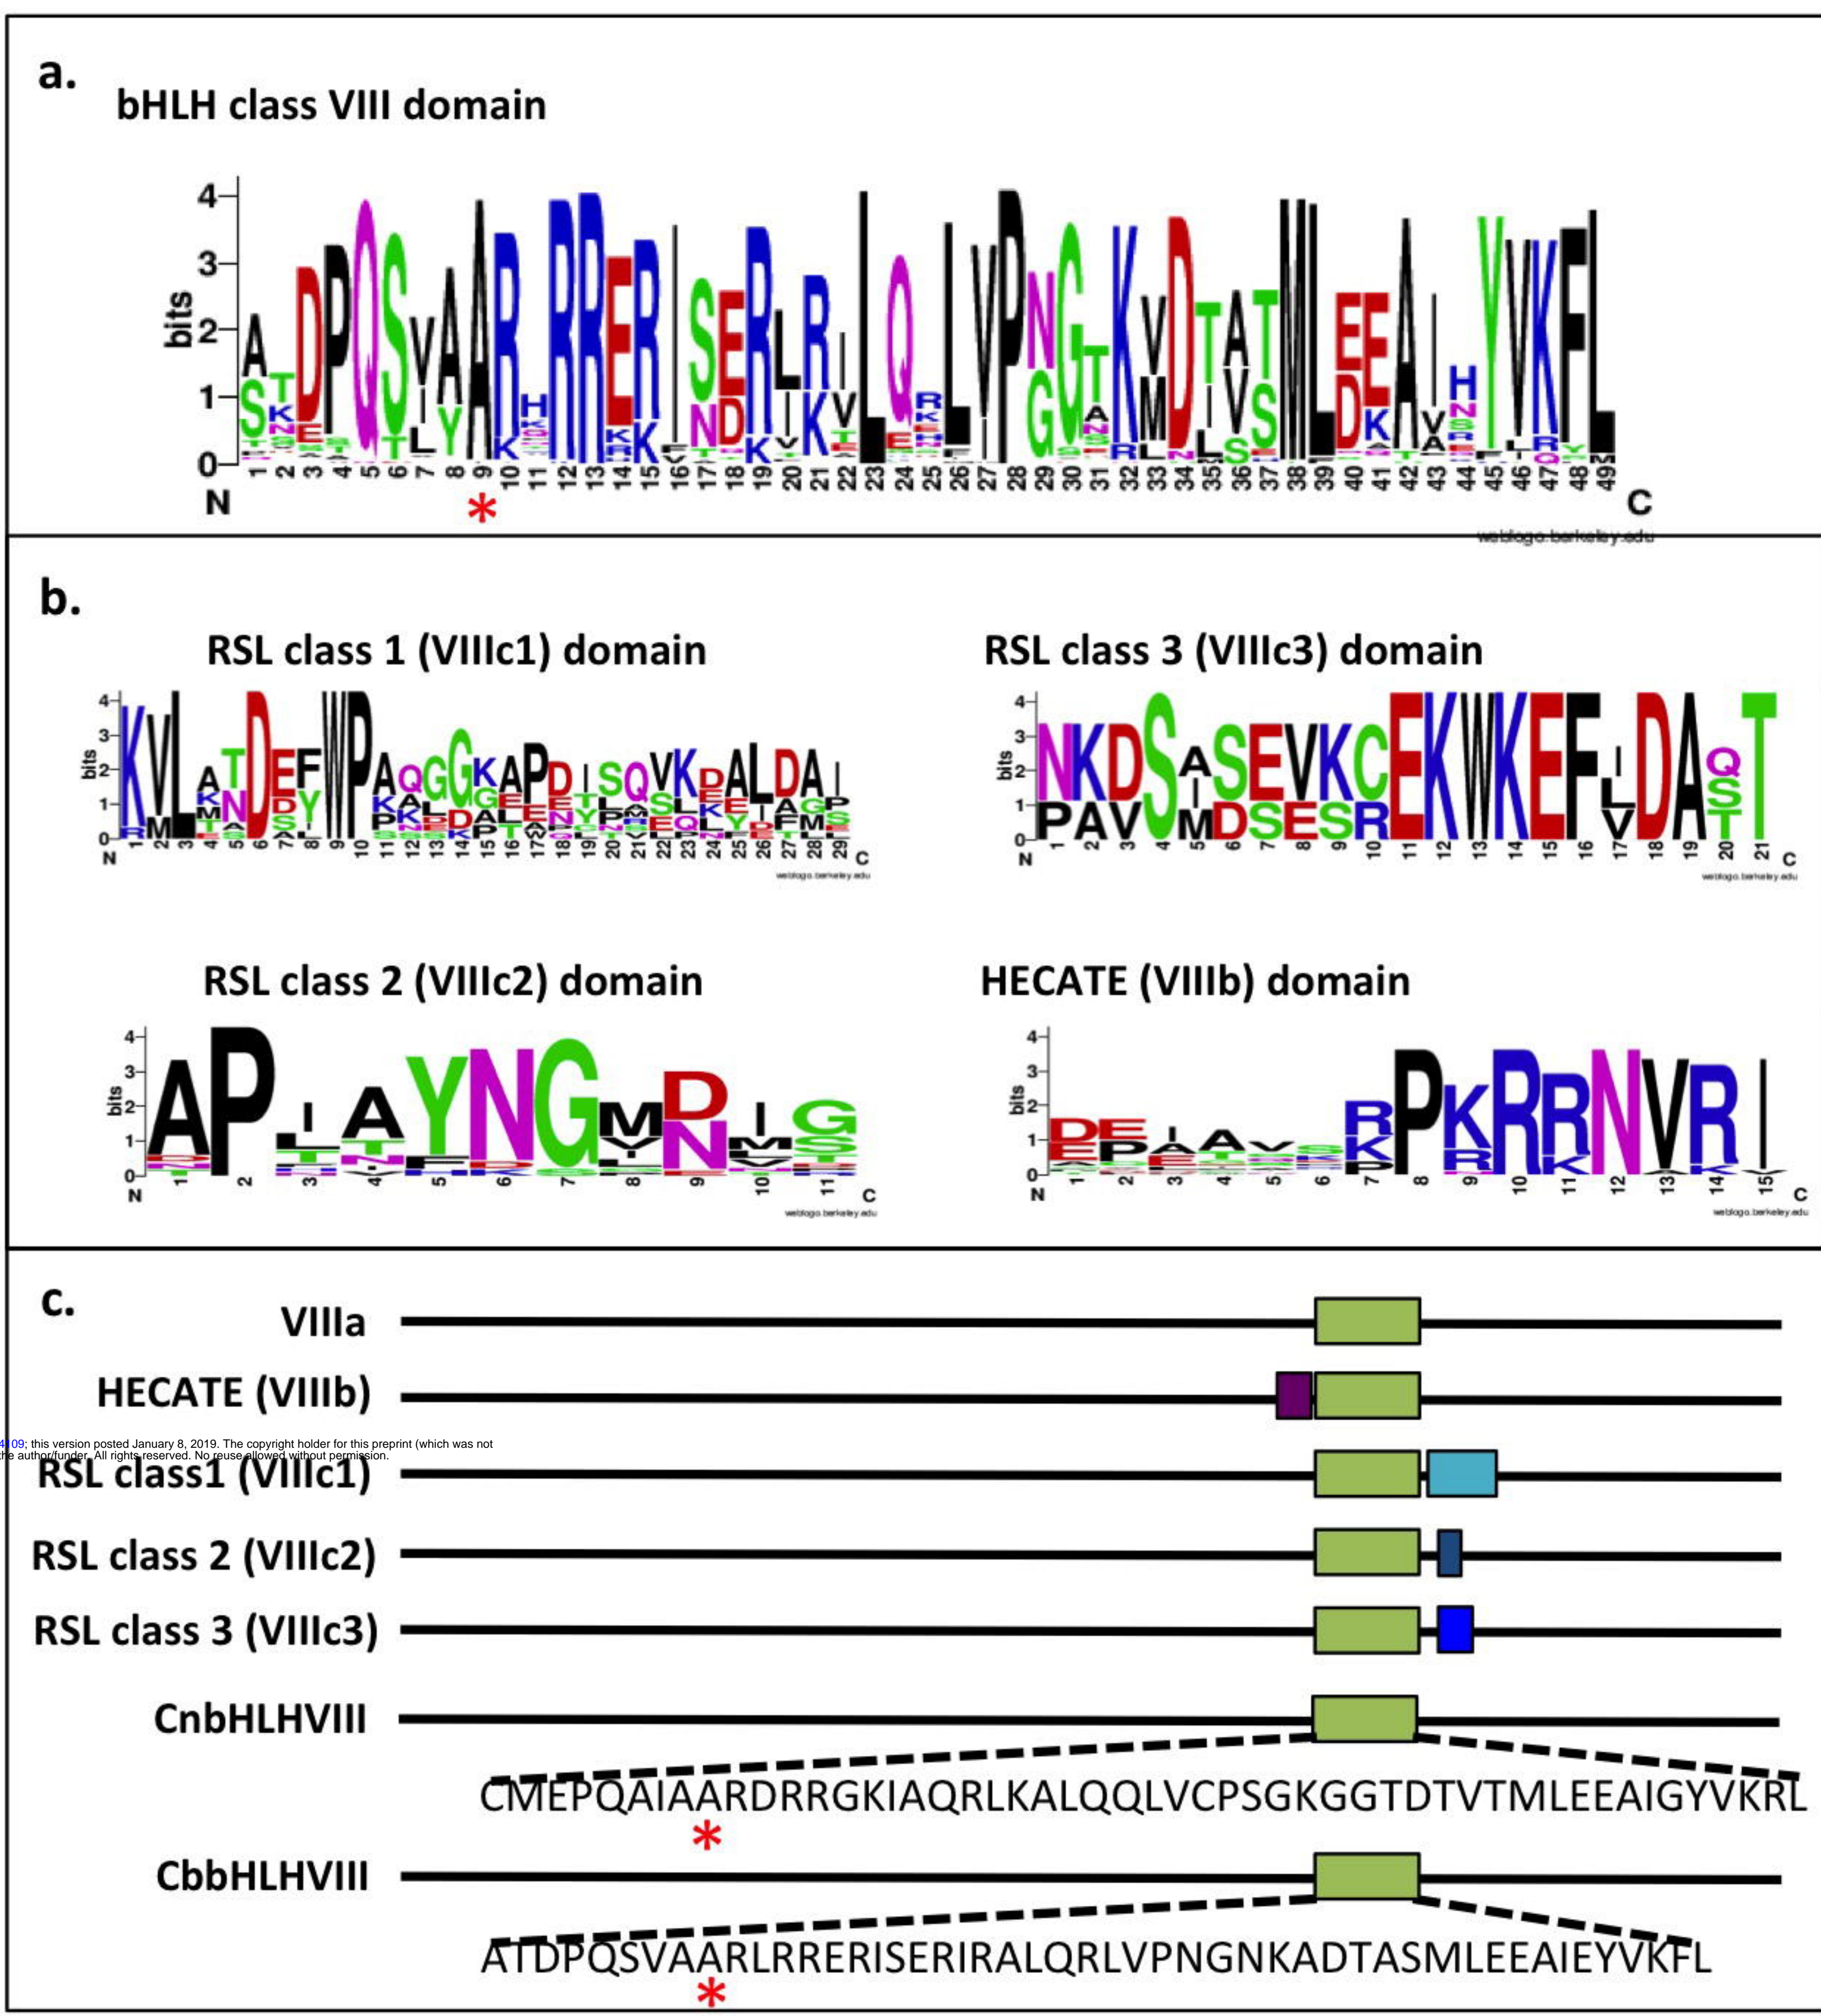

bioRxiv preprint doi: <https://doi.org/10.1101/514109>; this version posted January 8, 2019. The copyright holder for this preprint (which was not certified by peer review) is the author/funder. All rights reserved. No reuse allowed without permission.



Figure 3.

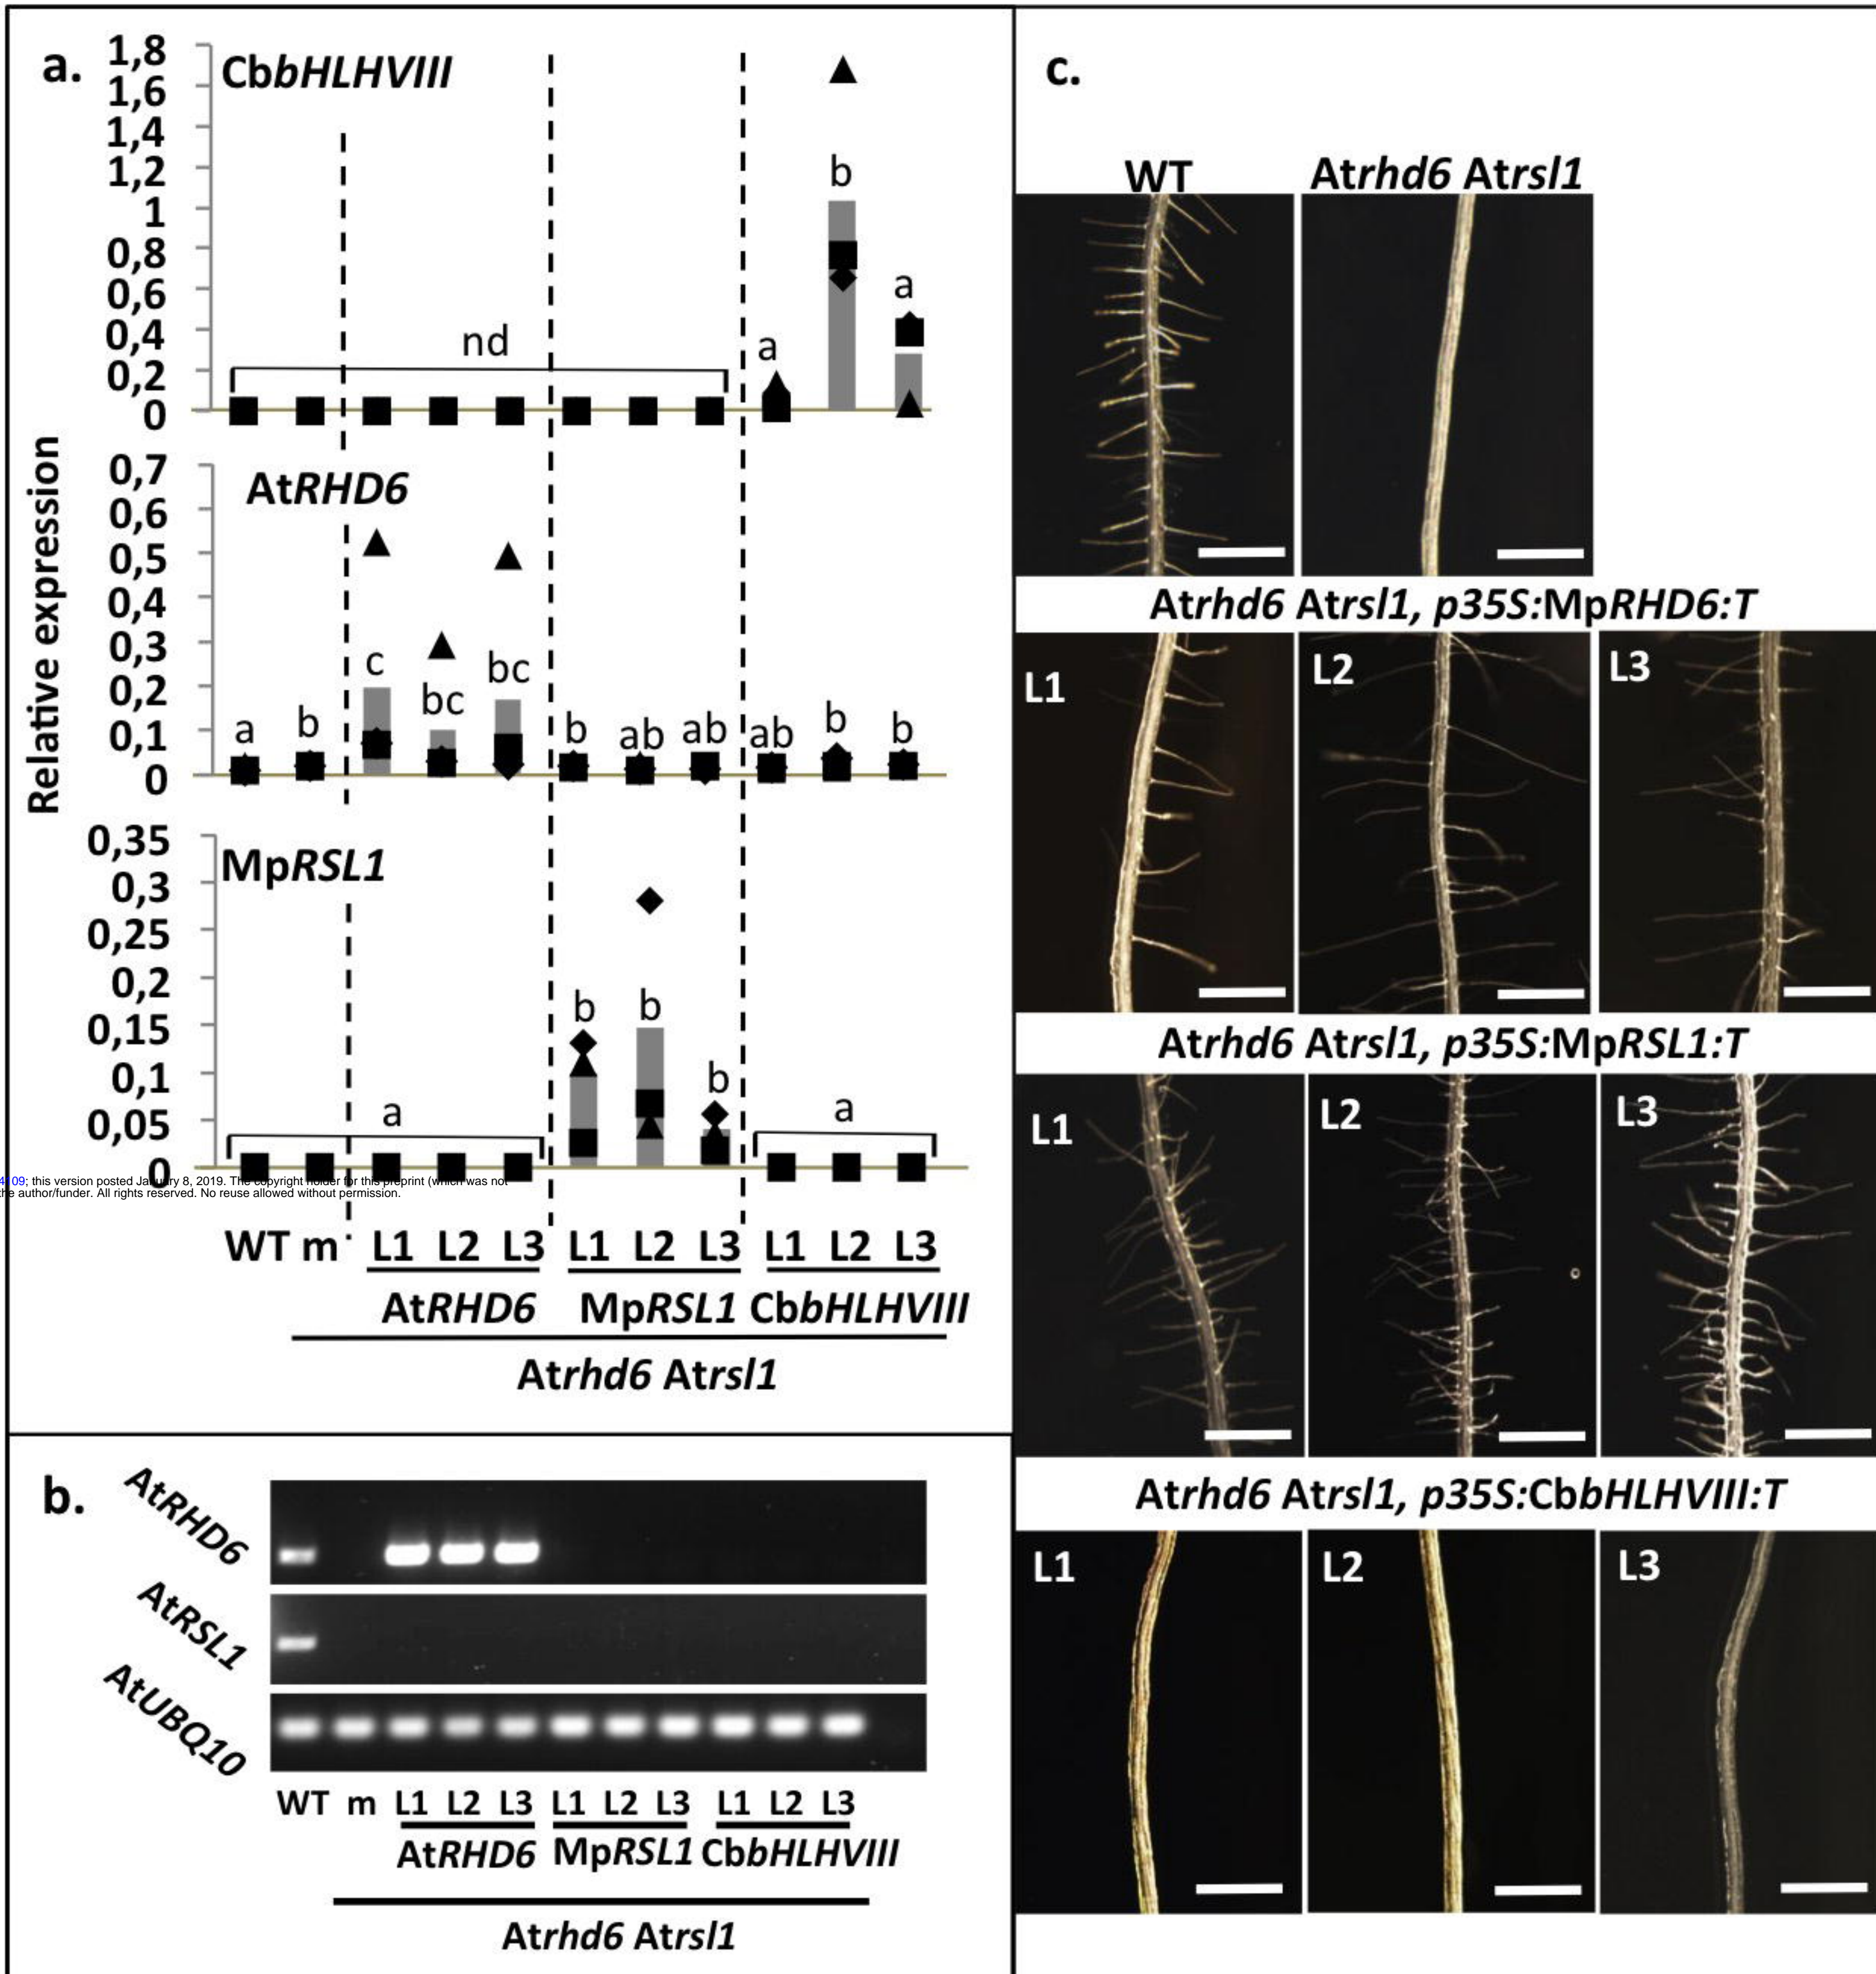

bioRxiv preprint doi: <https://doi.org/10.1101/514009>; this version posted July 8, 2019. The copyright holder for this preprint (which was not certified by peer review) is the author/funder. All rights reserved. No reuse allowed without permission.



Figure 4.

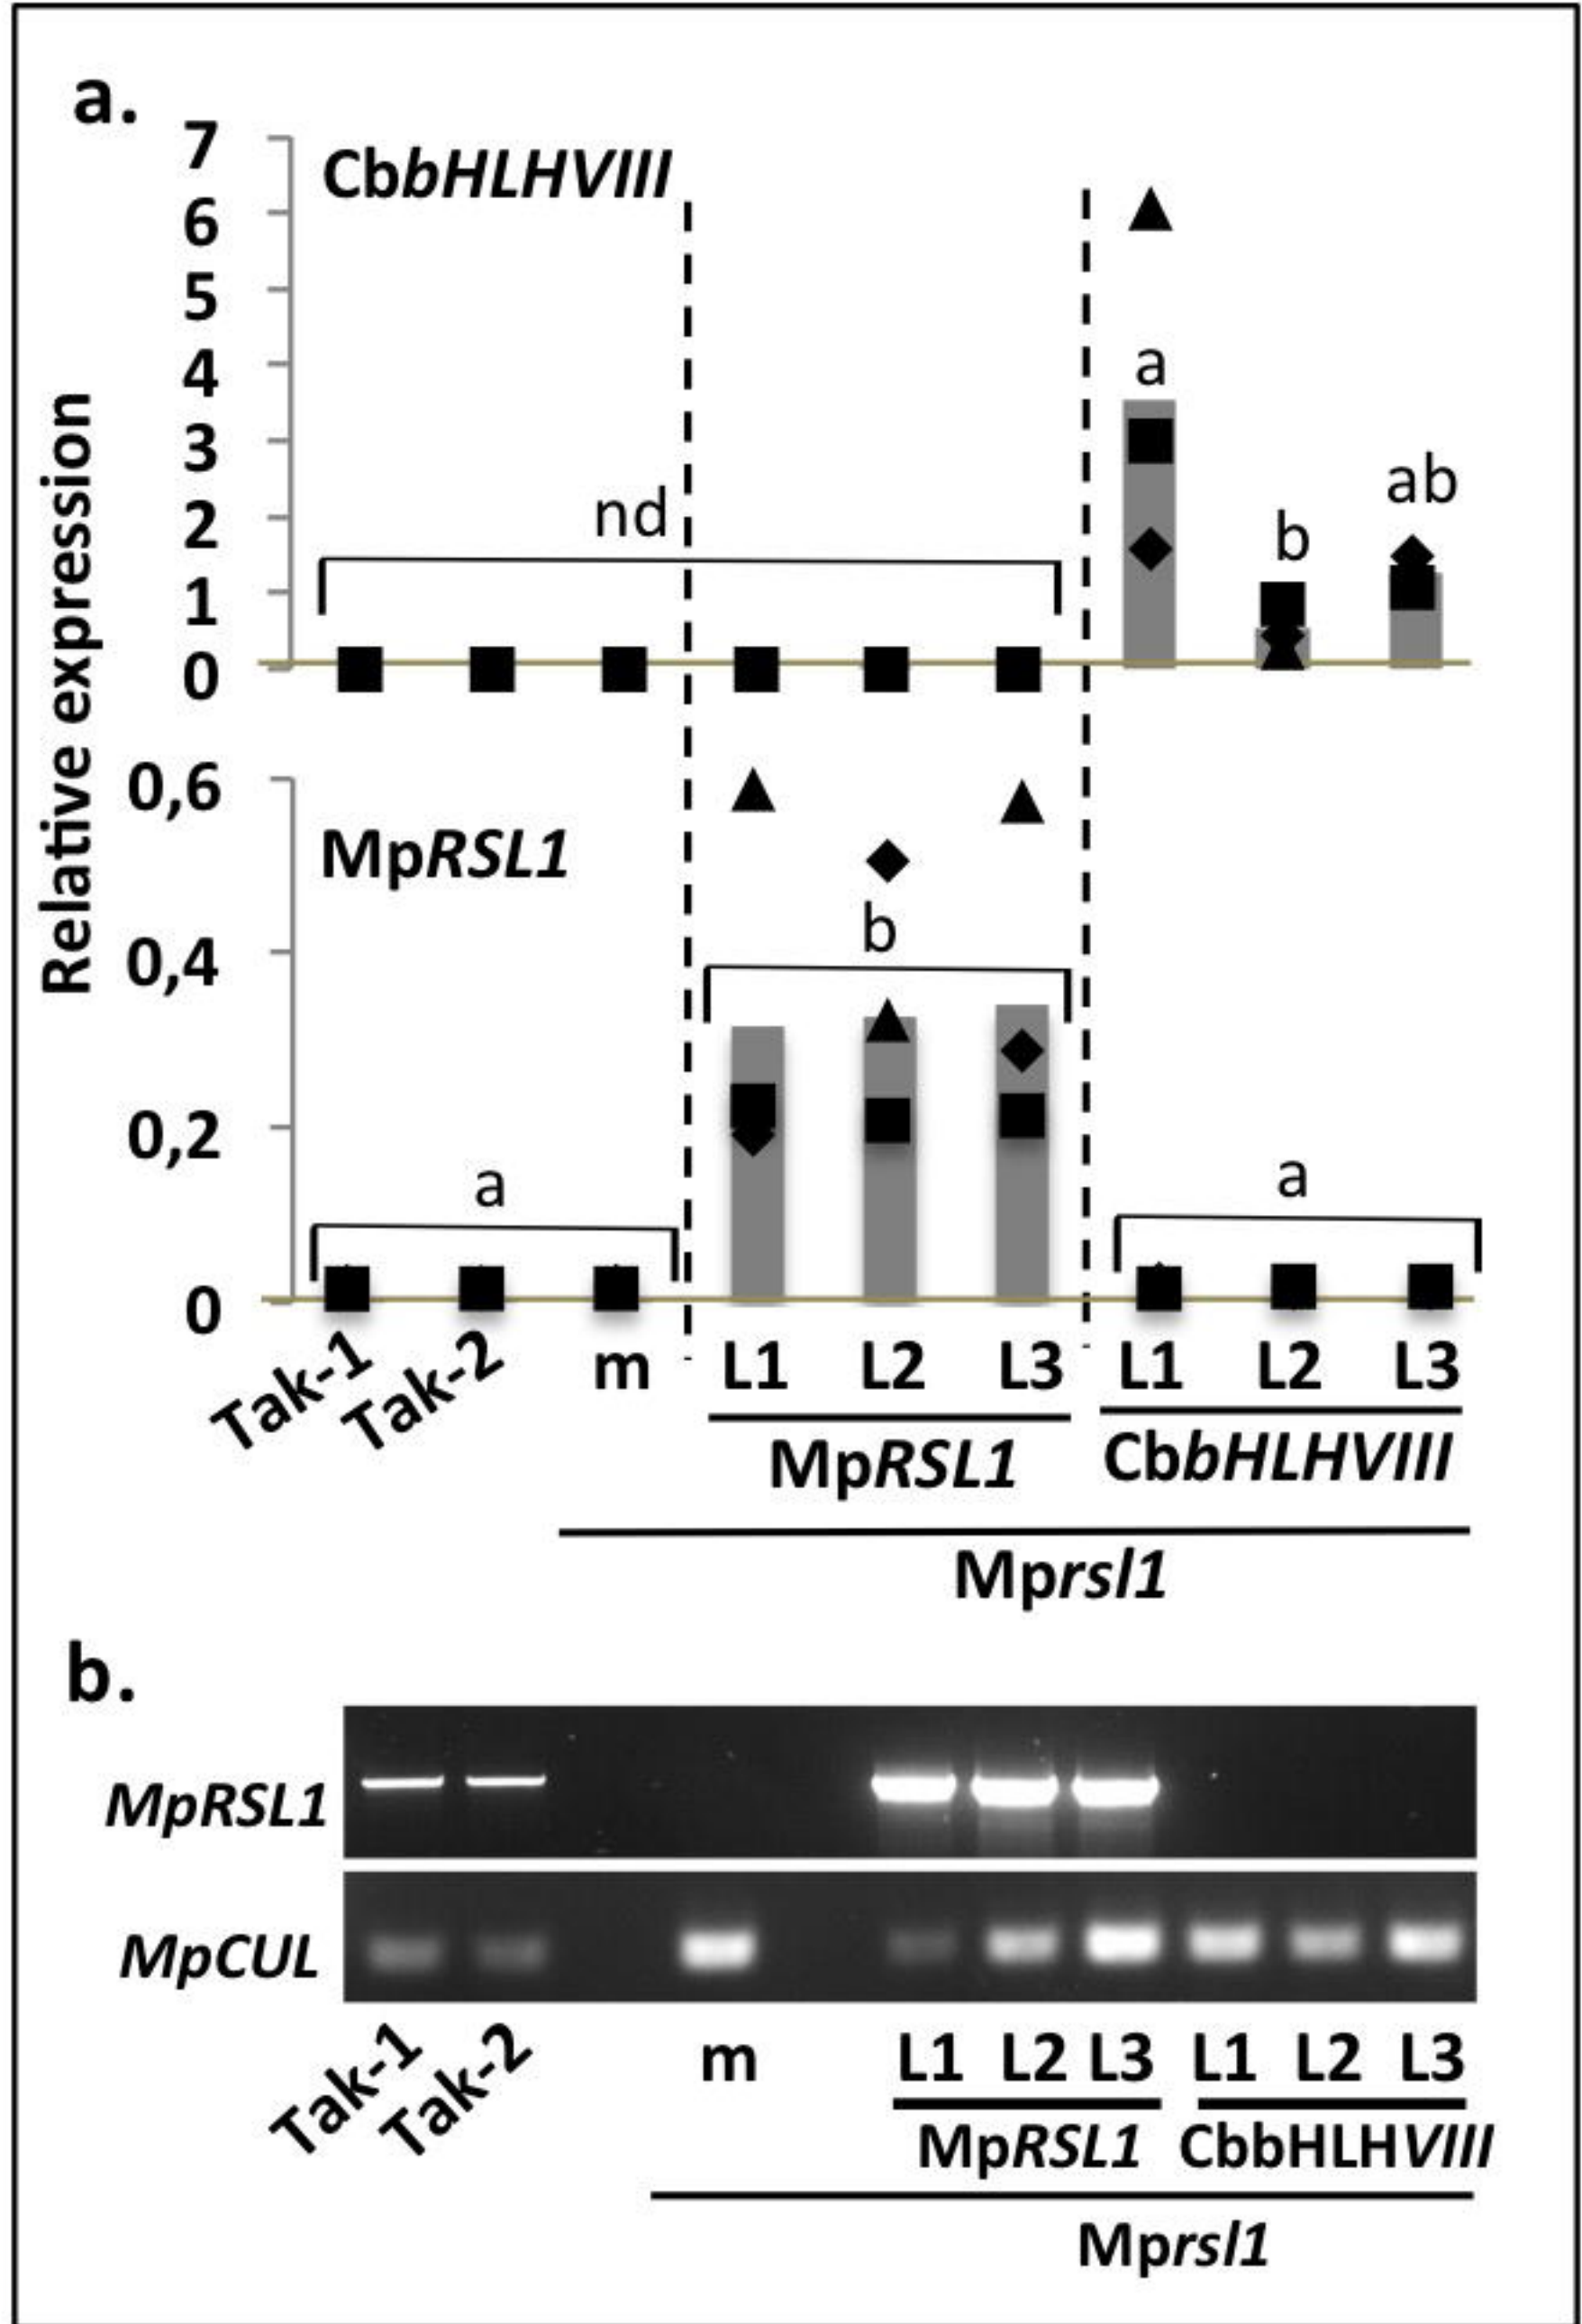



Figure 5.

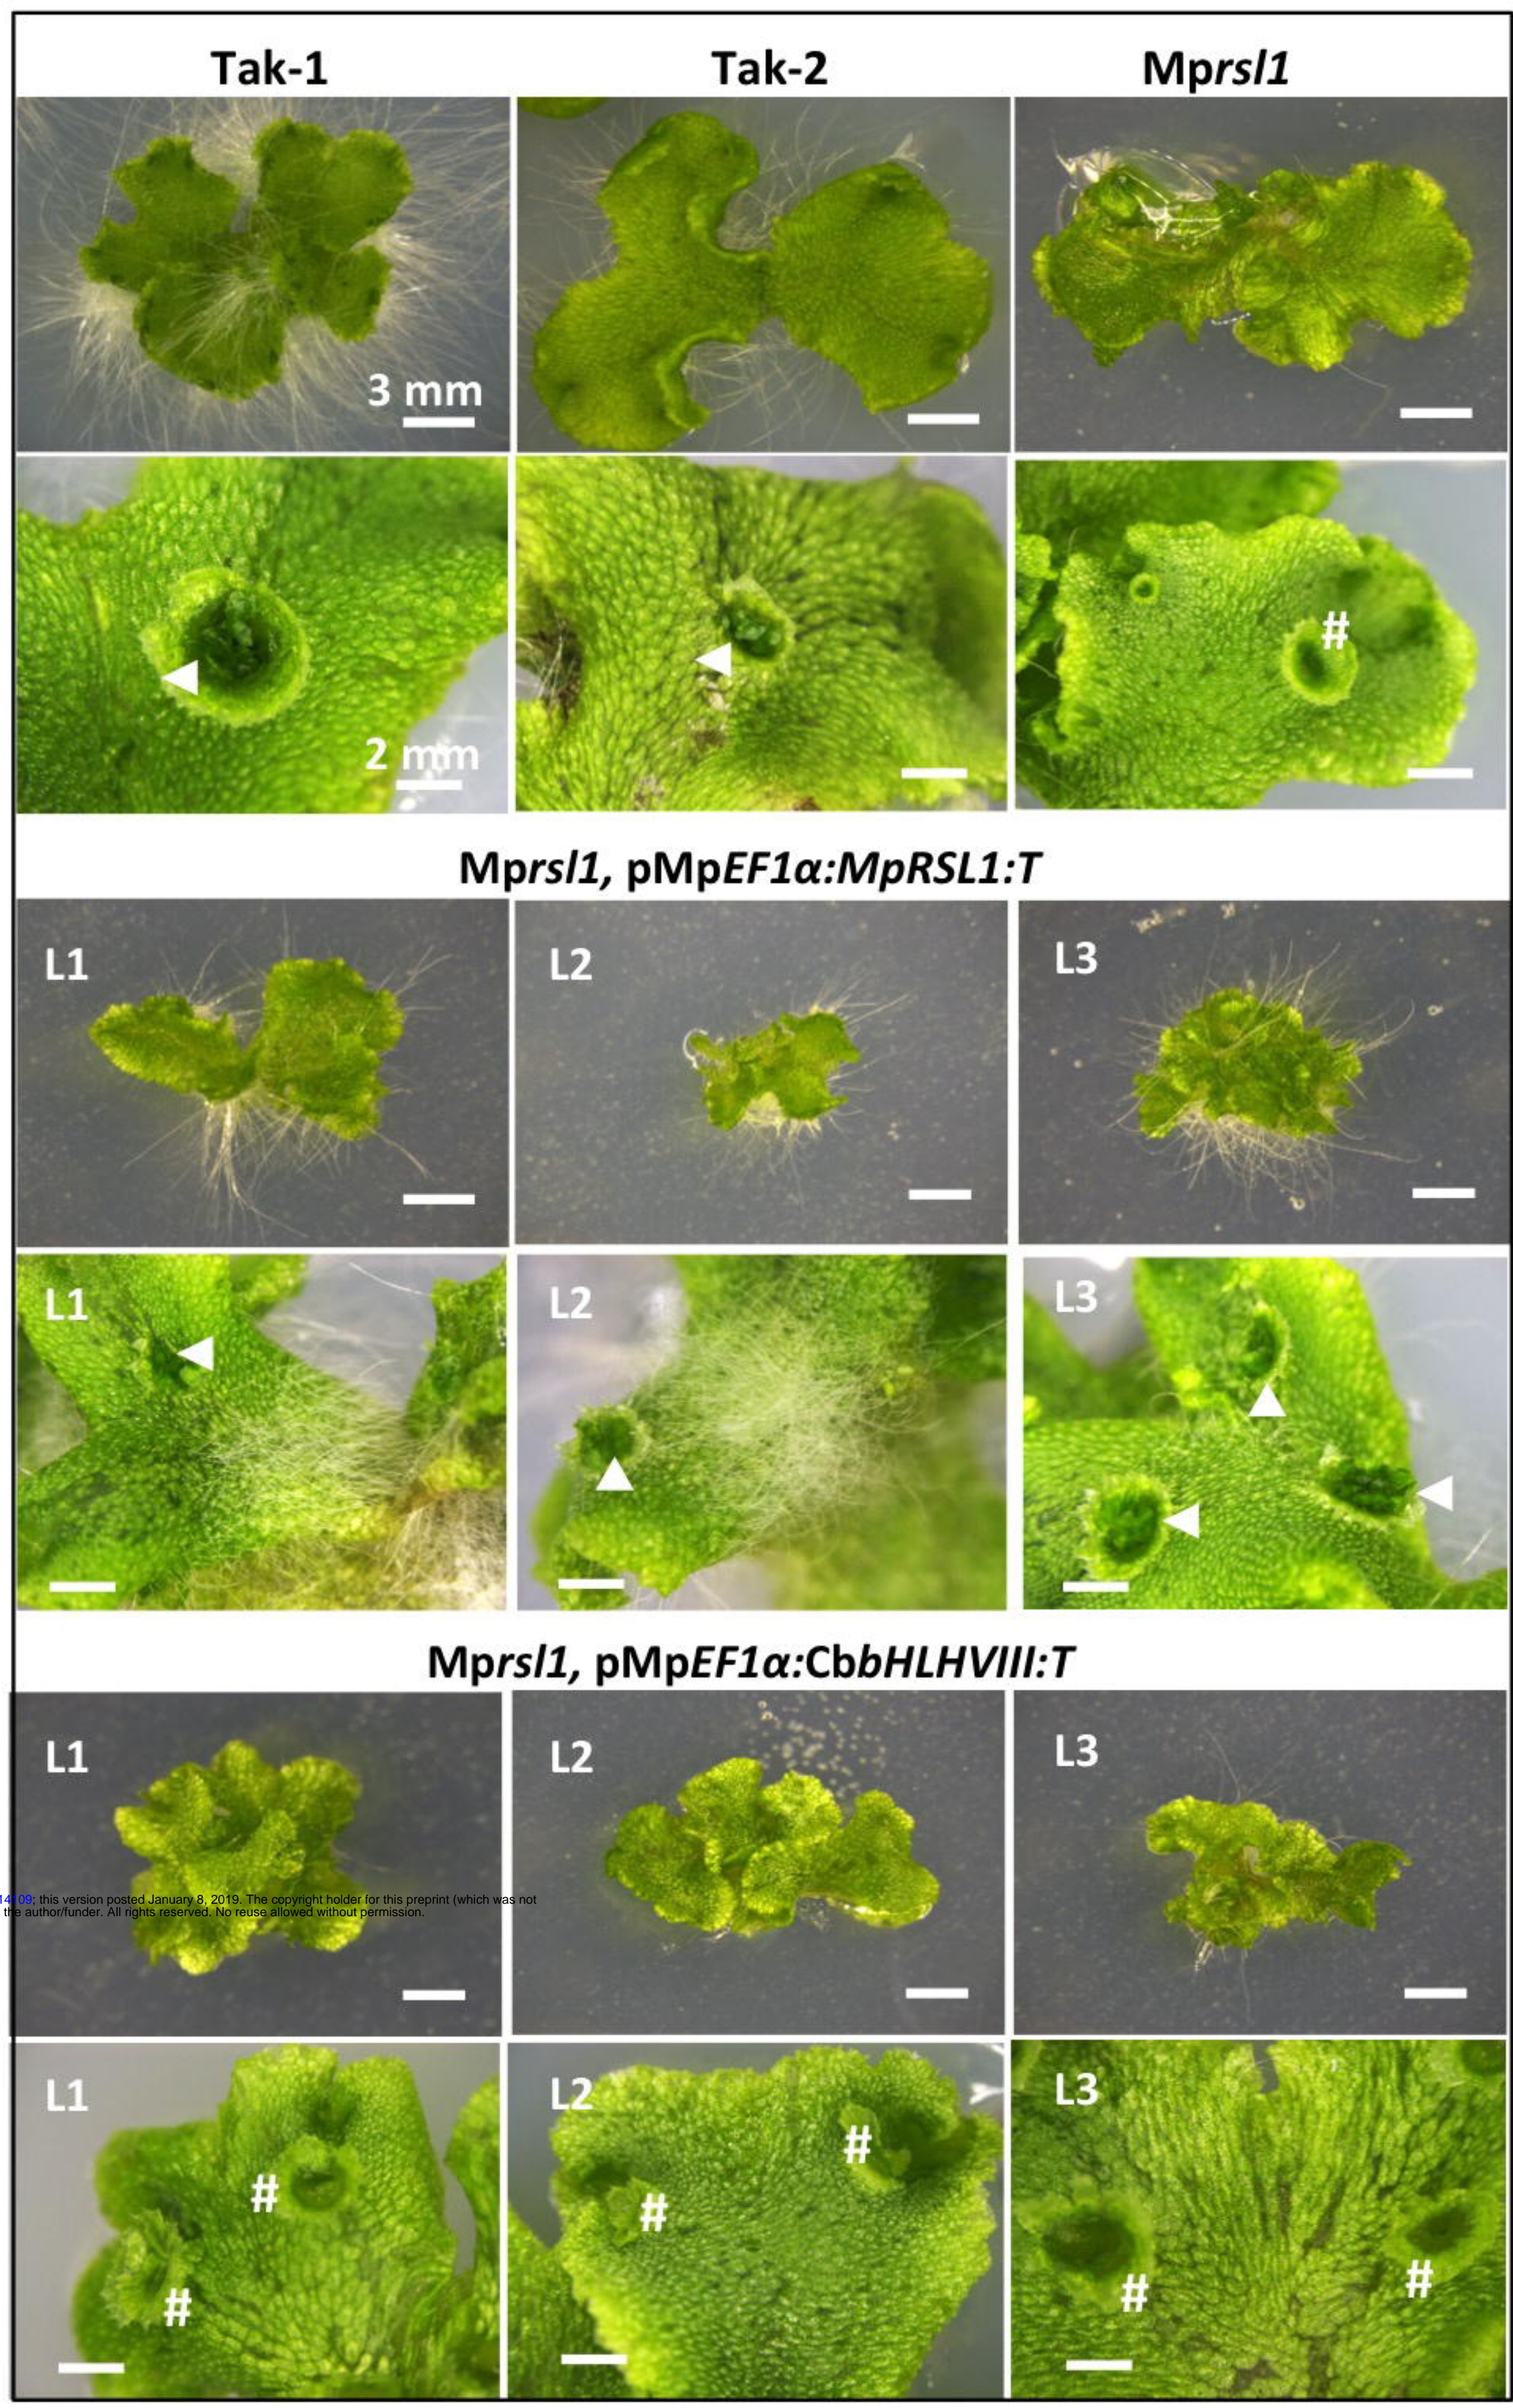

bioRxiv preprint doi: <https://doi.org/10.1101/514009>; this version posted January 8, 2019. The copyright holder for this preprint (which was not certified by peer review) is the author/funder. All rights reserved. No reuse allowed without permission.



Figure 6.

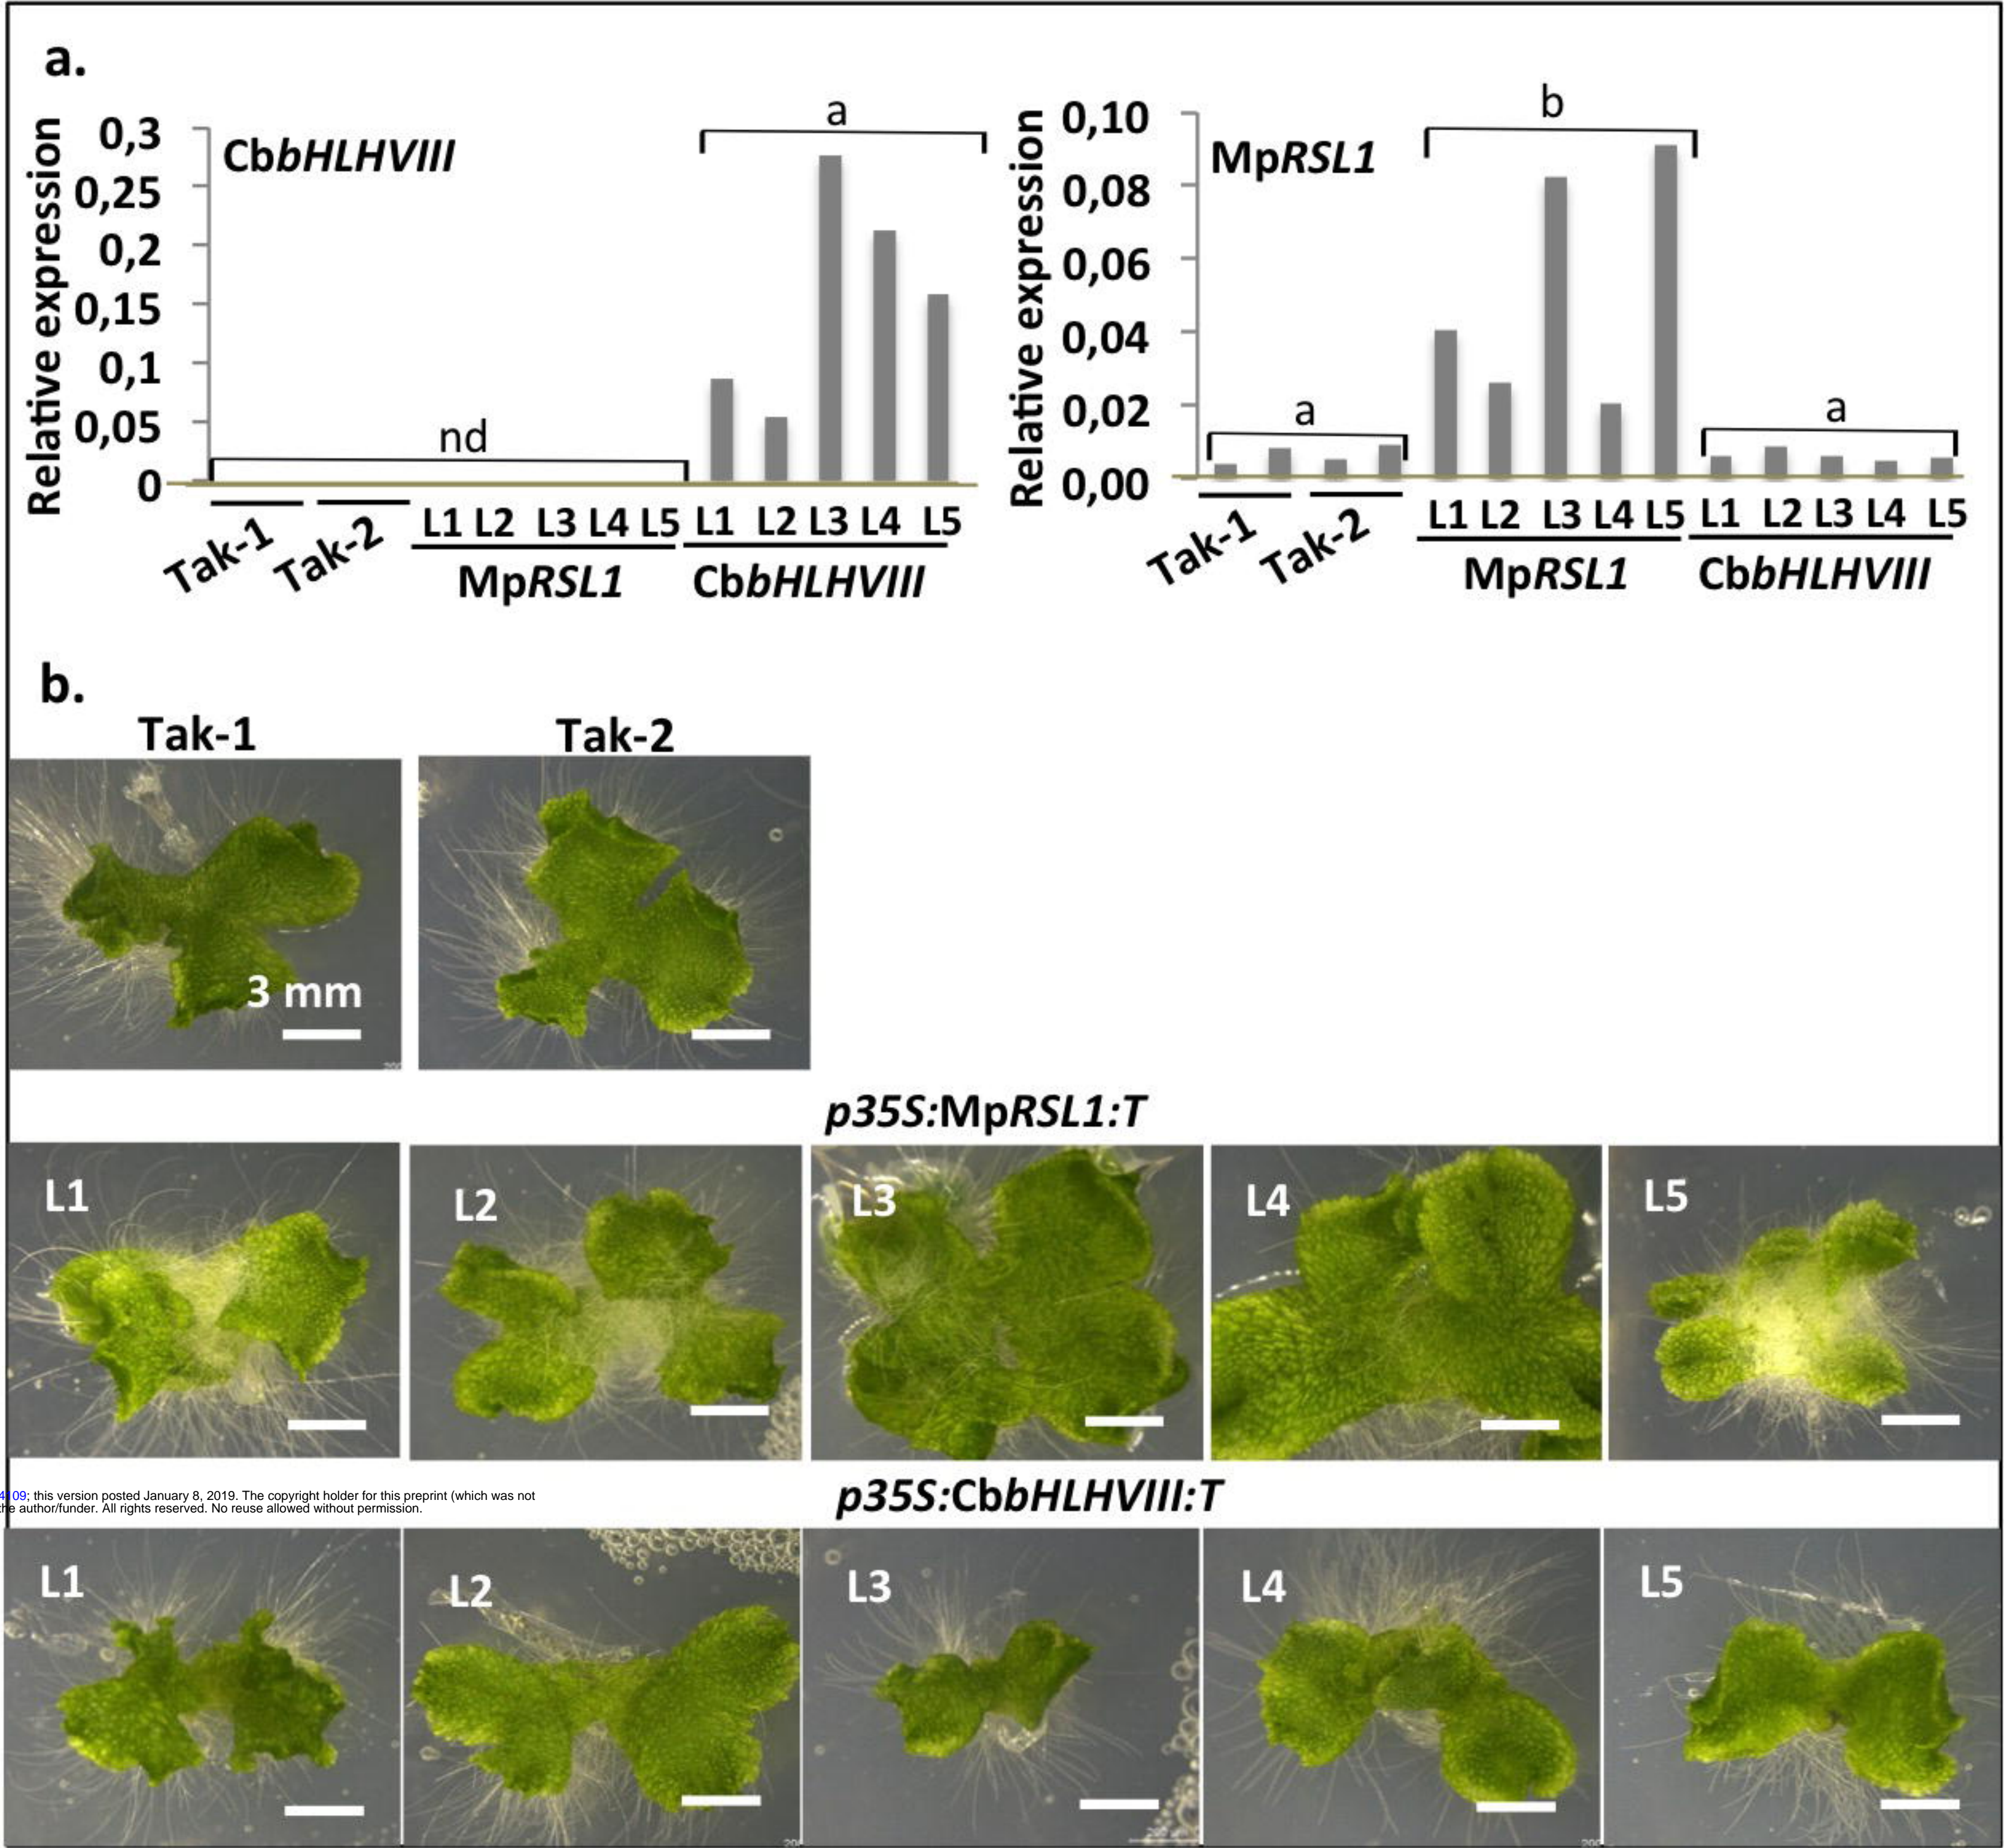

bioRxiv preprint doi: <https://doi.org/10.1101/514109>; this version posted January 8, 2019. The copyright holder for this preprint (which was not certified by peer review) is the author/funder. All rights reserved. No reuse allowed without permission.



Figure 7.

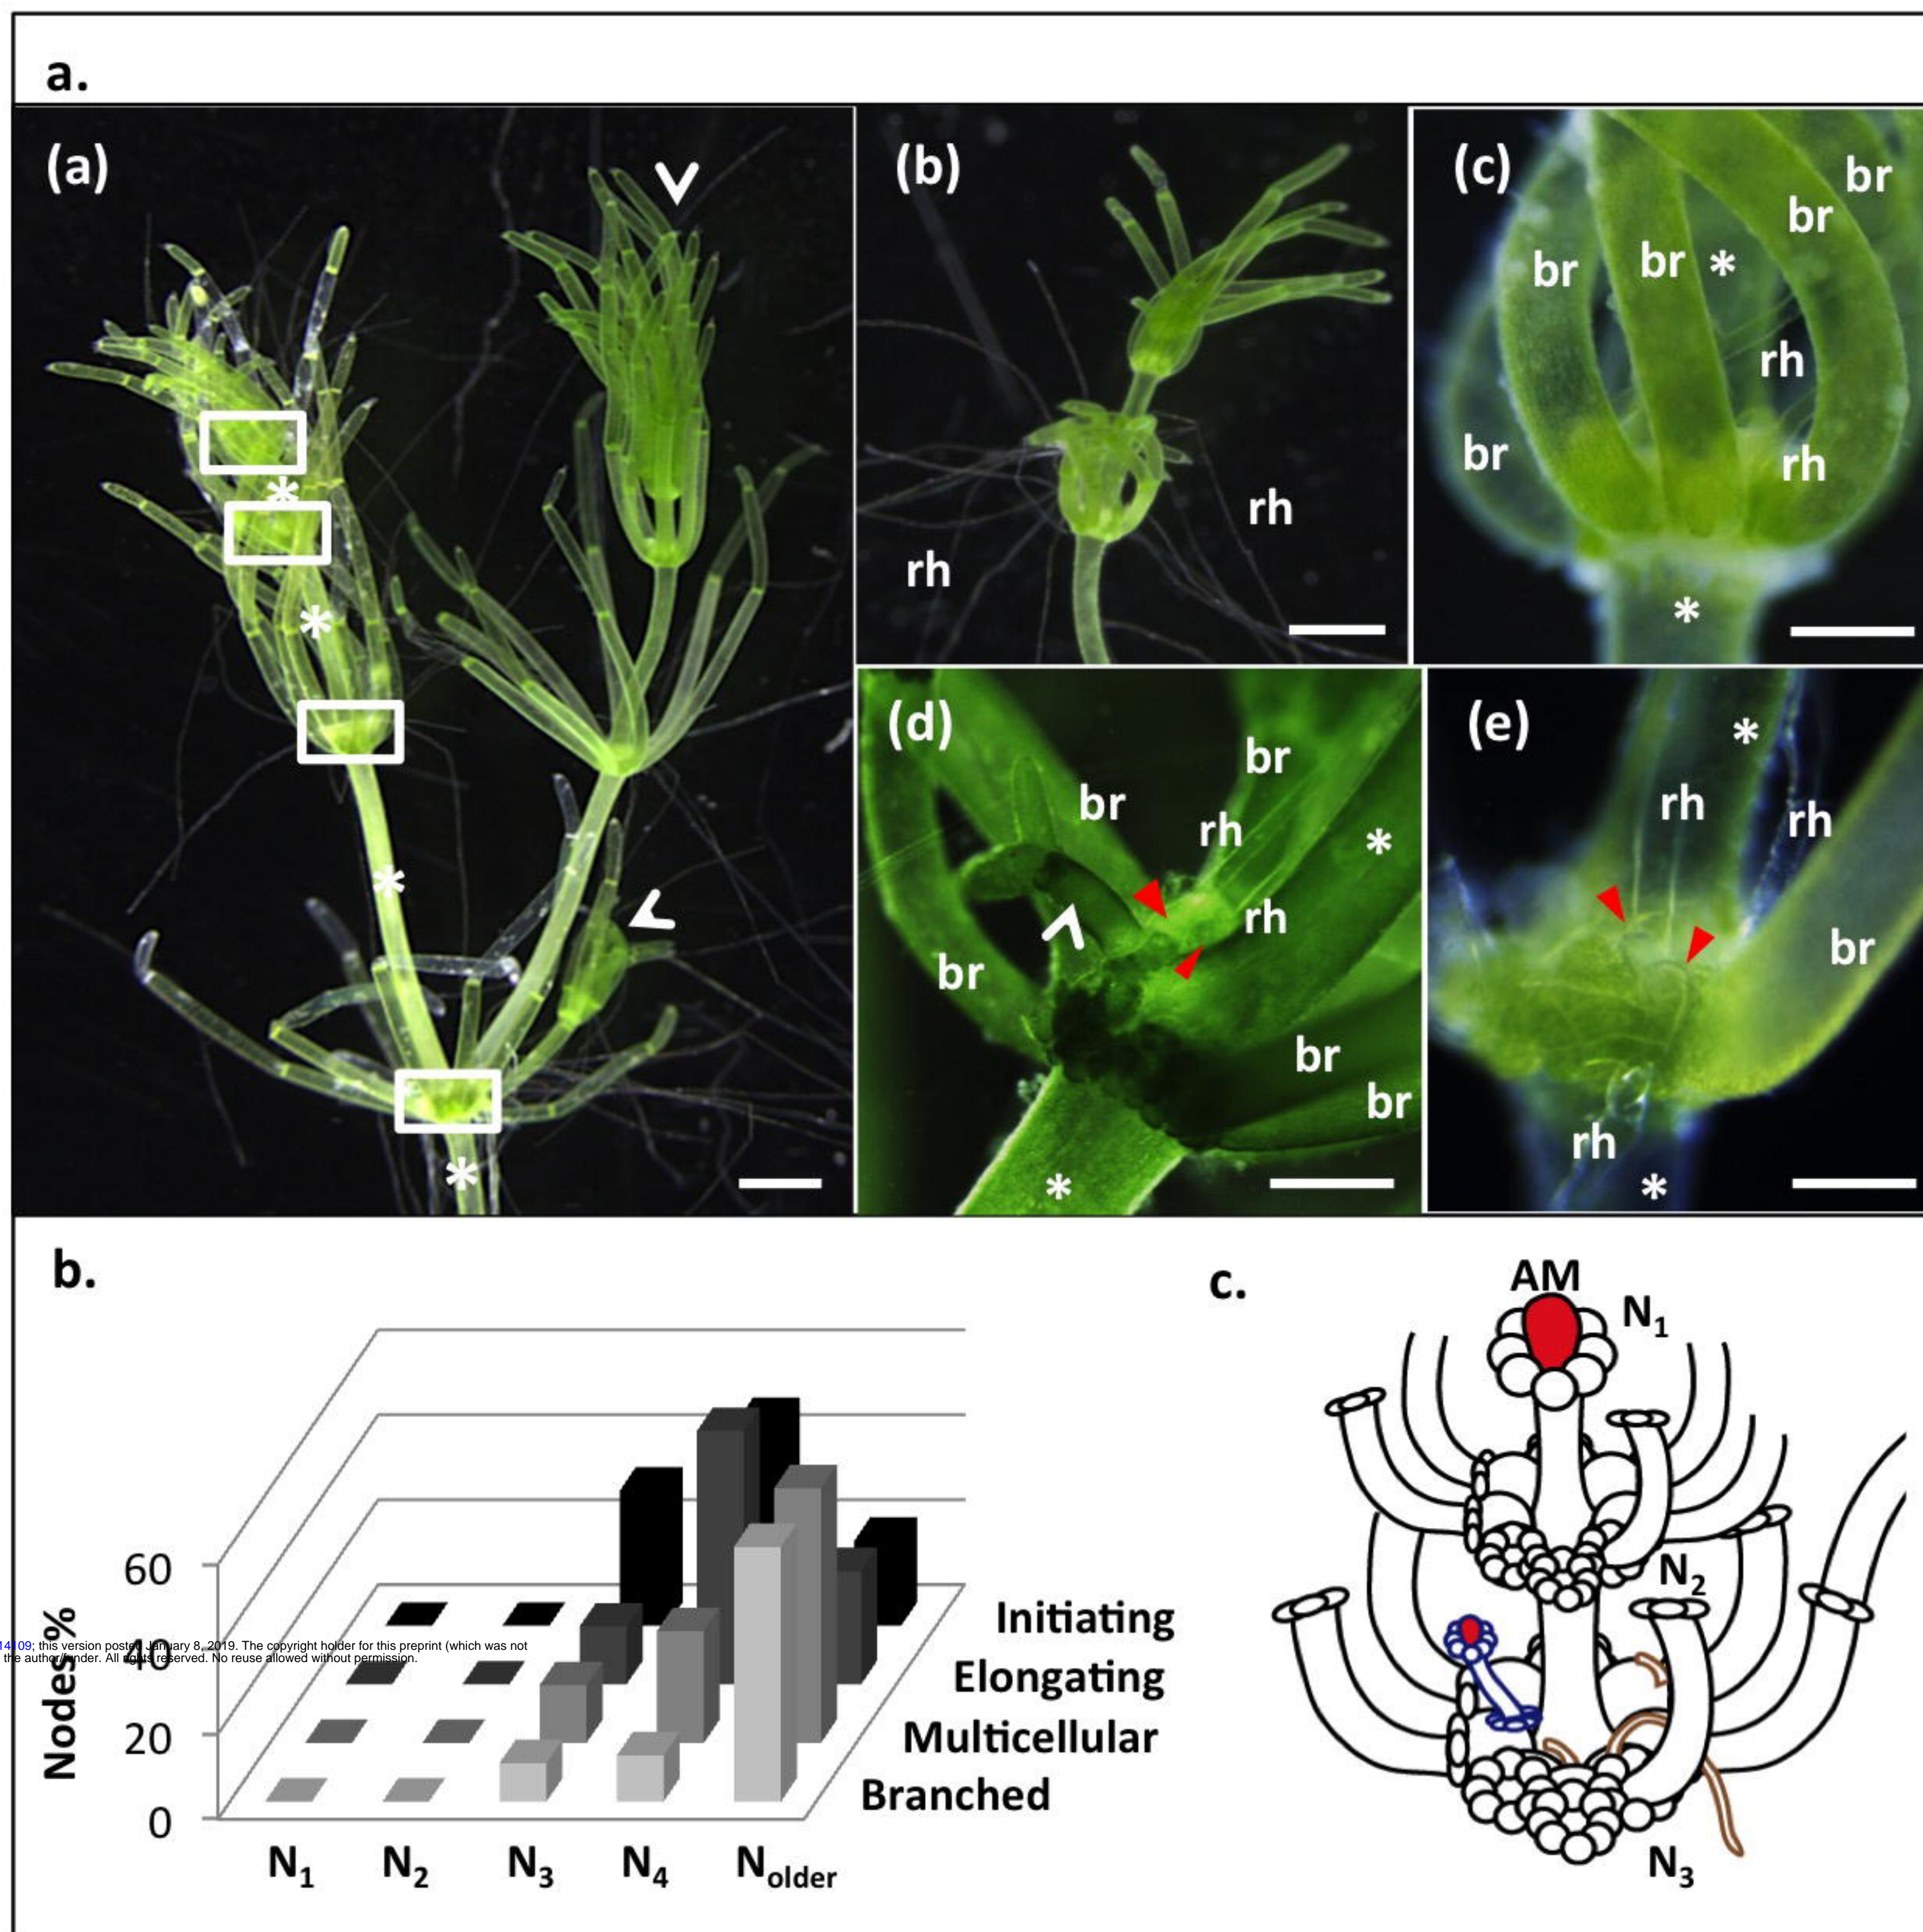



Figure 8.

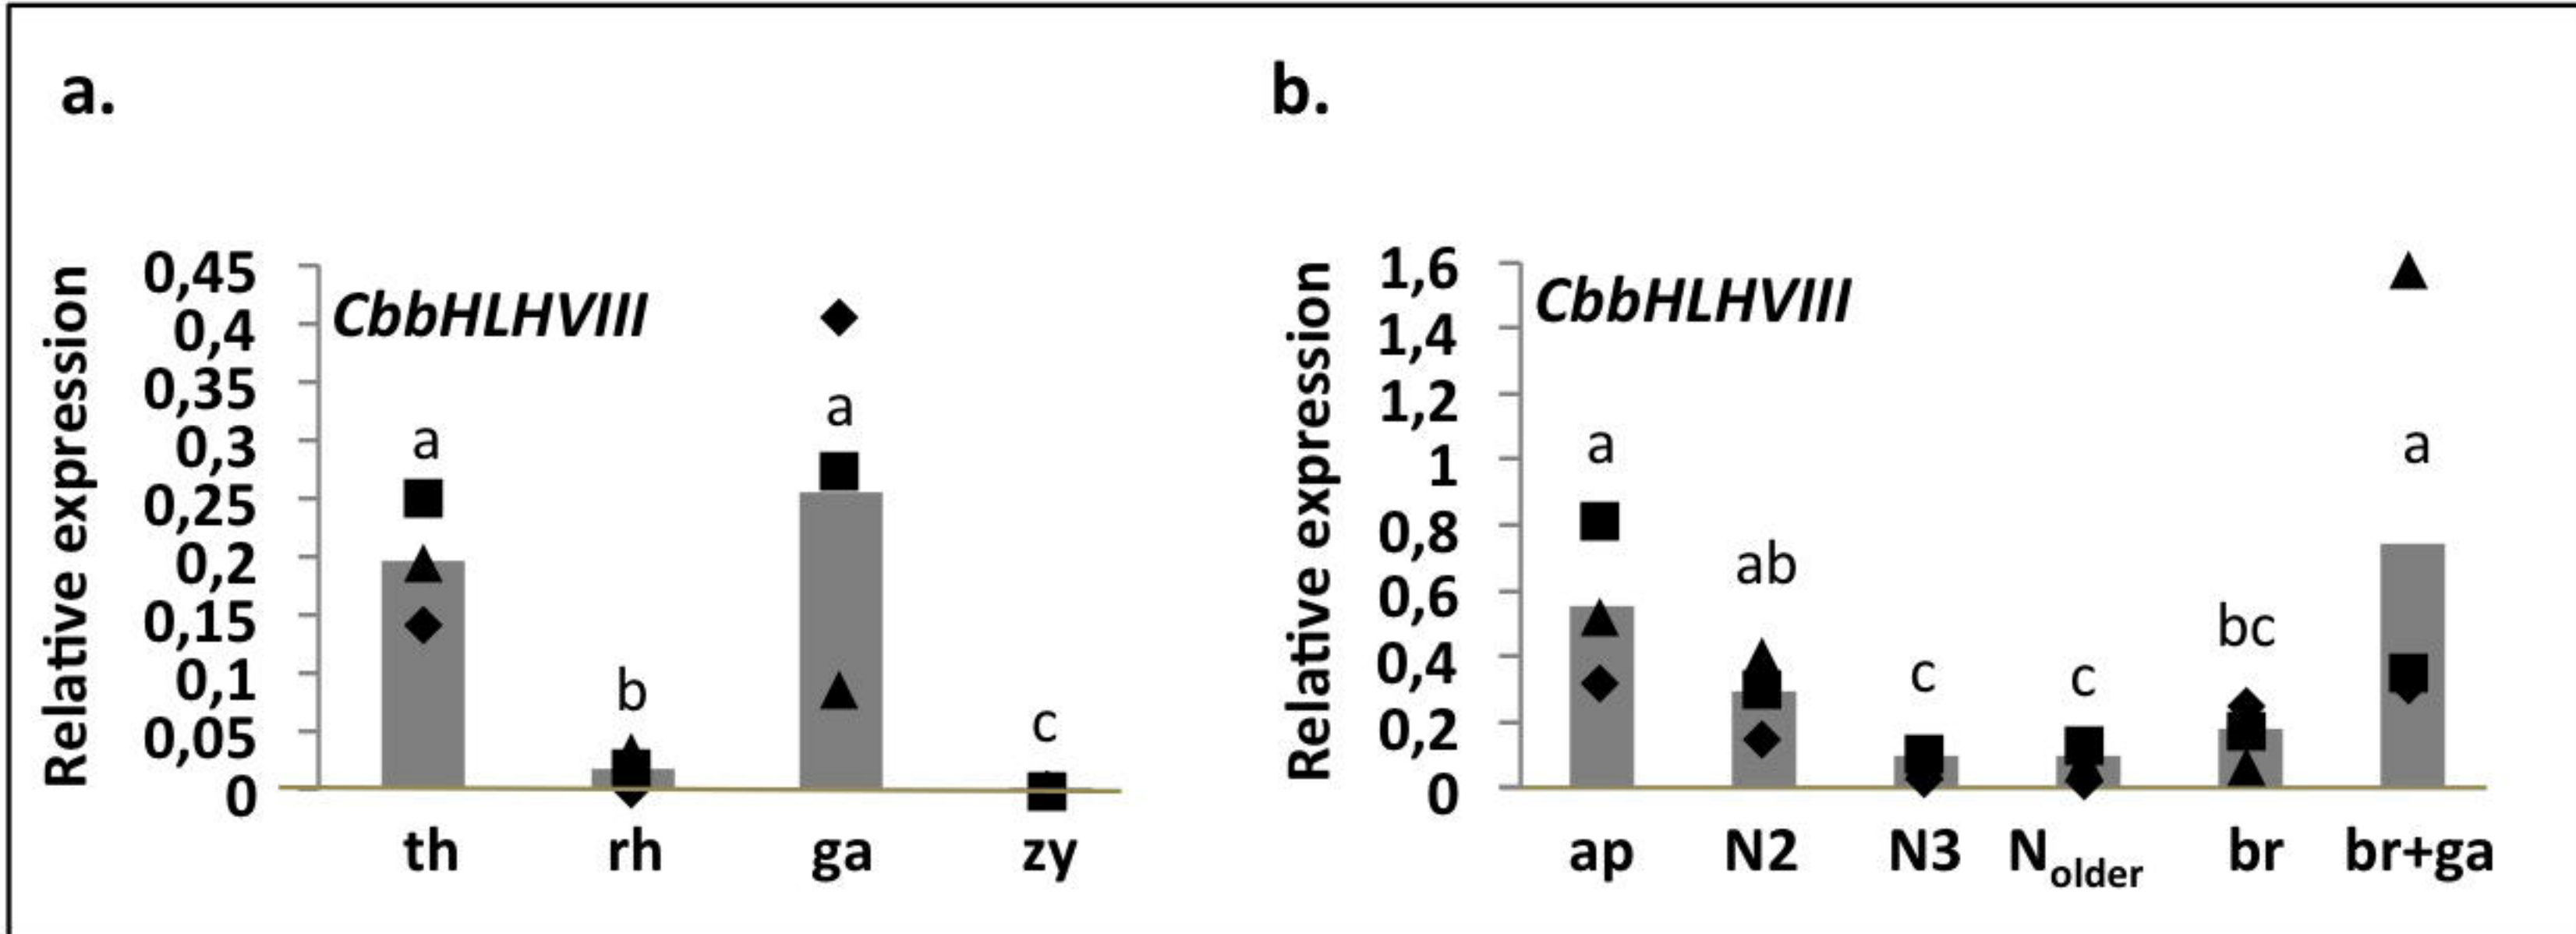

Source: https://www.biorxiv.org/content/10.1101/514109v1.full.pdf
